# Supplementary material
Source: publisher figshare collection journal article supplement (https://gsapubs.figshare.com/articles/dataset/_/20420670)
Supplement: Supplementary file 1 [file 1]

## **Supplemental Material**

### **Secular variation in seawater redox state during the Marinoan Snowball Earth event and implications for eukaryotic evolution**

**Weibing Shen, Xiangkun Zhu, Bin Yan, Jin Li, Pengju Liu, Simon W. Poulton**

- **Text S1: Geological Setting and Study Section Description**
- **Text S2: Glaciation System**
- **Text S3: Materials and Methods**
- **Text S4: Background and Interpretation of Geochemical Data**
- **Text S5: Alternative Hypotheses for Seawater Redox Variability**
- **Figure S1:** Global reconstruction of the location of the Yangtze block and stratigraphic division of the Neoproterozoic transect in the Yangtze block.
- **Figure S2:** Morphology of pyrite for Nantuo Formation in South China.
- **Figure S3:** Photographs showing lithofacies of the Nantuo Formation from the ZK01 core section.
- **Figure S4:** Model showing pyrite formation in the water column and sediments under oxic, ferruginous, and euxinic conditions.
- **References Cited**

## **Text S1: Geological Setting and Study Section Description**

### **Geological Setting**

South China consists of two tectonic units: The Cathaysia block in the present southeast, and the Yangtze block in the present northwest (Fig. 1a). The Yangtze block was an independent continental block during the late Neoproterozoic, with direct connection to the open ocean to the southwest (Wang and Li, 2003; Fig. S1a).

Our samples from the Nantuo Formation were collected from a drill core (ZK01) from Taojiang city in northwestern Hunan Province, Yangtze block of South China (Fig. 1a). Neoproterozoic strata (Tonian strata, Cryogenian strata and Ediacaran strata) are well preserved on the Yangtze block, with some of the best age constraints in the world (Jiang et al., 2011; Fig. S1b). The Cryogenian strata include two glacial units separated by an interglacial interval (Zhang et al., 2011). The Chang'an Formation/Fulu Formation/Gucheng Formation/Tiesi'ao Formation, correspond to the Sturtian glaciation (ca.720-659 Ma; Wang and Li, 2003; Lan et al., 2015; Wang et al., 2019), and are mainly composed of diamictites. The interglacial strata, represented by the Datangpo Formation/Xiangmeng Formation, deposited from ca. 659 Ma to ca. 649 Ma (Zhou et al., 2018; Bao et al., 2018; Wang et al., 2019), and mainly comprise shale and siltstone with local manganese deposits (Zhang et al., 2015; Peng et al., 2019). The Nantuo Formation corresponds to the Marinoan glaciation, and mainly comprises glacial diamictite deposited between ca. 649 Ma to ca. 635 Ma (Condon et al., 2005; Zhang et al., 2008; Zhang et al., 2011; Schmitz 2012; Zhou et al., 2018; Bao et al., 2018; Wang et al., 2019). The Nantuo Formation, the target strata, has a wide distribution across the Yangtze block (Fig. 1b). The thickness of this unit varies significantly, from 60-100 m in shallow water settings such as the Hubei Yangtze Gorges area, through 200-300 m in slope settings such as the Guizhou Daotuo area, to a few thousand meters in basin settings such as the Hunan Tongdao area (Fig. S1b; Wang and Li, 2003; Zhang et al., 2011).

As a whole, the Cryogenian Nantuo Formation has a conformable contact with the cap carbonate rocks of the overlying Ediacaran Doushantuo Formation across a basin-wide transect (Fig. S1b; Jiang et al., 2011; Lang et al., 2018a). Although the lithofacies of the two formations are obviously different, a conformable contact is observed (Lang et al., 2018a; Yan et al., 2020; Shen et al., 2021). On the one hand, as shown by a gradual upward increase in the calcareous content of the rocks in the top part of the Nantuo Formation, the lower glacial deposits progressively transform into a cap carbonate (Lang et al., 2018a; Yan et al., 2020; Shen et al., 2021). On the other hand, clastic gravels often appear at the bottom of the cap carbonate,

representing a continuous transition between glacial and post-glacial deposits (Lang et al., 2018a; Yan et al., 2020; Shen et al., 2021).

The contact relationship between the Nantuo Formation and underlying non-glacial strata in the research area is complicated (Figs. 1b and S1b; Zhang et al., 2008; Peng et al., 2019; Yan et al., 2020; Shen et al., 2021). In shallow water settings, the Nantuo Formation has an unconformable contact with purple-red sandstone of the Liantuo Formation (Zhang et al., 2008; Peng et al., 2019; Yan et al., 2020; Shen et al., 2021). An unconformity between the Nantuo Formation and the Liantuo Formation is shown by deformation structures (Zhang et al., 2008; Peng et al., 2019; Shen et al., 2021). In slope-basin settings, the Nantuo Formation has a conformable contact with black shale of the Datangpo Formation/Xiangmeng Formation (Zhang et al., 2008; Peng et al., 2019; Yan et al., 2020; Shen et al., 2021). Although there are large changes in gravel content and size between the Nantuo Formation diamictite and the underlying interglacial shale of the Datangpo Formation/Xiangmeng Formation, no unconformity is observed. Instead, a gradual transition between the two formations is evident in terms of colour, organic content and general lithology (Zhang et al., 2008; Peng et al., 2019; Yan et al., 2020; Shen et al., 2021).

## **Study Section Description**

The ZK01 core documents a slope-basin setting (Fig. 1a), and the Nantuo Formation from the core has a conformable contact with the underlying interglacial Datangpo Formation mudstone and the overlying Ediacaran Doushantuo Formation carbonate (Figs. S1b and 2). Thus, the Nantuo Formation recovered from the core section was deposited during the Marinoan glaciation (Fig. 2).

The Nantuo Formation in ZK01 is about 295 m thick, and mainly comprises diamictite lithofacies, with local fine-grained lithofacies (Fig. 2). The diamictite lithofacies in the Nantuo Formation contains abundant pyrite (Fig. 2 and S2), and is mainly composed of dark gray gravel-bearing carbonaceous sandstone, light gray gravelly siltstone, and dark gray-light gray siltstone (Figs. 2 and S3). This lithofacies is entirely matrix-supported and the gravels are poorly sorted, disordered, and angular-shaped (subangular-circular and subangular dominate) (Figs. 2 and S3). The composition of the gravels is diverse, although it is dominated by sandstone gravels and basic rock gravels. The gravel content of the diamictite is generally greater than 5%, and locally greater than 30%. The gravel sizes range from 2 mm to nearly 5 cm, with mm-scale size dominating. We emphasize here that the gravel size and content show regular changes throughout the Nantuo Formation, marking two lithological cycles (Fig. 2).

At the base, the Nantuo Formation from the core section conformably overlies the black

shale of the interglacial Datangpo Formation (Figs. 2 and S3). The first lithological cycle (0-125 m), begins with a gravel sandy-mudstone interval, and mainly consists of dark-gray gravel-bearing carbonaceous siltstone in the lower part, dark-grey gravelly sandstone in the middle part, and grey sandstone and gravel-bearing siltstone in the upper part (Fig. 2). The gravel contents vary from < 10% at the bottom, through 30% in the middle, to < 10% at the top. Correspondingly, gravel sizes change from 0.2-1.5 cm, to 2.0-3.0 cm, and then back to 0.5-1 cm. The first cycle, as an entire shallowing-deepening sequence, ends with a ca. 4 m thickness of carbonate rock interval (Figs. 2 and S3). The second cycle (*ca* 125-295 m) mainly consists of light-grey gravel-bearing siltstone in the lower part, grey gravelly sandstone in the middle part, and light-grey calcareous gravel-bearing siltstone in the upper part. Similar to the first cycle, both the gravel content and size in this cycle first increase and then decrease. The gravel contents range from 0% to 25%, occasionally reaching 35%. Gravel sizes concentrate around 0.2-3 cm (generally 0.5-1 cm) (Fig. 2). The regular changes in gravel content and size indicate another entire shallowing-deepening sequence. At the top of the Nantuo Formation, post-glacial cap carbonate rocks of the Ediacaran Doushantuo Formation conformably overlie the diamictite (Figs. 2 and S3).

## **Text S2: Glaciation System**

### **Glacial Sedimentology**

Sedimentological characteristics of the Cryogenian successions are essential for interpreting the paleoenvironment in which these deposits formed. Based on distance from the ice grounding line, glacial facies can mainly be classified into ice-contact facies association, proximal glacial-marine facies association, and distal glacial-marine facies association (Boulton and Deynoux, 1981; Naish et al., 2009; Lang et al., 2018a). As is common in glacial sediments, proximal glacial-marine facies and distal glacial-marine facies are observed in the Cryogenian successions of South China.

The proximal glacial-marine facies association is mainly reflected by an assemblage of deposits formed near the ice grounding line (Brodzikowski and Van Loon, 1987). The sediments mainly consist of meter-scale massive diamictite lithofacies and gravel-containing sandstones, which are usually deposited from gravity flow debris and rainout of ice-rafted debris transported by glaciers. The proximal glacial-marine facies association can be observed in the Nantuo Formation at multiple sections in South China, and mainly consists of thick massive diamictites

(Fig. 1b; Shen et al., 2021). For example, evident massive diamictite lithofacies are developed in the lower part of the Nantuo Formation in the ZK01 core section, with thicknesses of more than 10 m (Fig. 2). When the flow pattern of subglacial meltwater drainage changes in the proximal glacialmarine environment, the resultant lithofacies will transform. This is shown by the transformation of thick massive diamictite lithofacies into other lithofacies, such as weakly sorted massive diamictite, gravel-bearing sandstones, and siltstones. There are many lithofacies transformations in the Nantuo Formation of South China. For example, in the upper part of the Nantuo Formation in the ZK01 core section, there are multiple massive diamictite-gravel sandstone cycles, which can be classified as a proximal glacial-marine facies association.

The distal glacial-marine facies association represents a set of sedimentary rocks formed in the environment far from the ice grounding line (Brodzikowski and Van Loon, 1987). This facies association can be observed in the Nantuo Formation at multiple sections in South China and mainly includes meter-scale massive diamictite lithofacies, gravel-containing fine-grained sandstones, and drop-stone lithofacies. For example, drop-stone lithofacies were observed in the Nantuo Formation at the Shennongjia section, South China (Fig. 1d). Because the distal glacial-marine environment is far from the ice grounding line, low density flow debris and gravity flow debris were deposited, with local transient medium or high density flow debris. Once the debris was carried to the area near the grounding line, it was deposited due to jet flows. Subsequently, the jet-flow deposits can be reworked by flows in the shallow-water environment, winnowing the fine fraction and leaving gravel-bearing sandstones. Types of flow debris can be reflected by heterogeneous lithofacies: The coarse-grained sandstones with gravel always show high density flow debris, while the overlying sandstones and silts represent low density flow debris in a deeper water environment. The gravel-bearing coarse-grained sandstones in the Nantuo Formation in the ZK01 core section were likely deposited from high-density debris flows, which formed in a distal glacialmarine environment (Figs. 2 and S3). In addition, shales, siltstones and carbonates may be directly deposited from seawater with little glacial influence (Tucker et al., 1990; Łabaj and Pratt, 2016; Lang et al., 2018a), possibly in the distal glaciomarine environment or localised open water environment, as proposed by other studies (Lang et al., 2018a; Bai et al., 2020; Shen et al., 2021).

Based on sedimentary characteristics of the Nantuo Formation across a basin-wide transect, there is not only massive diamictite in the proximal glacial environment, but also gravel-containing fine-grained sediments in the distal glacial environment or the normal sea environment in South China (Fig. 4, Shen et al., 2021). The variations in the sedimentary facies of the Nantuo Formation in South China indicate that sedimentation was active during the glaciation.

## Glaciation Dynamics

The initial ‘Snowball Earth’ hypothesis posited a simple, stagnant glaciation, characterized by extremely cold climate, and hence an entirely frozen Earth during the Cryogenian period (Kirschvink 1992; Hoffman et al., 1998). Although the ‘Snowball Earth’ hypothesis has become widely accepted (Hoffman and Schrag 2002; Boyle et al., 2007; Rooney et al., 2015), the interpretation of the simple, stagnant nature of the prolonged glaciations remains controversial. Debate has mainly focused on the interpretation of sedimentological records of glaciogenic strata throughout the Cryogenian ice age, with data that indicate that the glaciations were dynamic rather than stagnant, and were associated with a relative strong climate and hydrological cycle.

The dynamic nature of the Cryogenian glaciation originally came from climate modeling. Hyde (2000) proposed rapid transitions into and out of a full glaciation, associated with decreased and increased temperatures, and an equatorial belt of open water that may have occurred during the ‘Snowball Earth’ event. The temperature fluctuations and changes in ice sheet extent were also deduced from follow-up simulations (Liu et al., 2020). These modeling results find support in sedimentary evidence. The key sedimentary records were vertical lithofacies alternations (Le Heron et al., 2014; Lang et al., 2018a; Hu et al., 2020; Yan et al., 2020). For example, studies from the Marinoan deposits in South China provide the basis for establishing a sequence stratigraphic framework that includes two complete glacial cycles across a basin-to-platform transect (Fig. 1b; Shen et al., 2021). Both cycles are characterized by repetition of glacially influenced units separated by non-glacial units. In addition, cyclic depositions of Marinoan units have been reported from elsewhere, such as Central Siberia (Chumakov, 2009), Oman (Allen and Etienne, 2008), Norway (Halverson et al., 2004), Southwest China (He et al., 2007), South Australia (Williams et al., 2008), and Scotland (Arnaud and Eyles, 2006). It is proposed that facies changes of the glacial deposits could be induced by excessive topography relief during the global glaciation (Hoffman et al., 2017b). In this scenario, deposition of diamictite during ice sheet melting may both create and destroy small-scale topography, resulting in short-distance migration of the depocenter and complexity in the stratigraphic detail of the glacial deposits. In particular, oversteepening of diamictite could generate reworked sediments, such as crudely stratified diamictite, pebbly sandstone and stratified sandstone (Hoffman et al., 2017b). This scenario seems to be a good explanation for variable thickness and vertical facies change of glacial deposits within a short distance. However, it cannot explain the stratigraphic variation of facies in the Nantuo Formation, which can be correlated across the Yangtze block and has a basin-wide scale (Lang et al., 2018a; Shen et al., 2021). Further, the thick non-glacial sequences (tens of meters) of siltstone/mudstones and carbonate beds in the Nantuo Formation cannot simply be interpreted as deposits during ice sheet

melting (Fig. 1b; Allen and Etienne, 2008; Lang et al., 2018a; Gu et al., 2019). Instead, the massive diamictite and pebbly sandstone were precipitated during the melting of ice sheet (Allen et al., 2004), while the clasts-free finegrained mudstone/siltstone and sandstone represented normal marine deposition with siliciclastic sediments transported by water currents (Talling et al., 2012). Thus, the repetition of glacially influenced units separated by non-glacial units in the Nantuo Formation records ice-sheet advancing-retreating cycles (Lang et al., 2018a; Bai et al., 2020; Shen et al., 2021).

Sedimentary records are a comprehensive reflection of paleoclimate changes and sea level fluctuations (Hoffman and Schrag 2002). When the paleoclimate was cold, ice sheets would form, sea level would drop, and hence the ice grounding line would advance seaward. Consequently, ice advance successions dominated by a proximal glacial lithofacies association would be deposited, and the gravel content and size of the rocks are increased (Lang et al., 2018a; Shen et al., 2021). By contrast, when the paleoclimate warmed, the ice grounding line would retreat and sea level would rise. As a result, ice retreat successions dominated by distal glacial lithofacies association would develop, and the gravel content and size of the rocks decreases (Lang et al., 2018a; Shen et al., 2021). Thus, the above-mentioned sedimentological records, interpreted to reflect gradual alternation from ice advance to ice retreat, indicates dynamic co-evolution of the sedimentary environment, paleoclimate, and sea level during the Marinoan glaciation (Lang et al., 2018a; Yan et al., 2020; Bai et al., 2020; Shen et al., 2021).

The Marinoan deposits of the slope-basin ZK01 setting in South China also have two complete glacial cycles (Fig. 2). The lower ice-advance succession of the glacial cycles consists primarily of a massive diamictite lithofacies association, and is dominated by proximal glaciomarine deposits. The gravel abundance and size of the deposits gradually increase upwards, suggesting a shallowing sequence. The upper ice-retreat succession of the glacial cycles is composed of both a massive diamictite lithofacies association and a fine-grained lithofacies association, representing a mix of distal glaciomarine, proximal glaciomarine, and non-glacial marine deposits. The gravel abundance and size of these varied deposits gradually decreases upwards, and is interpreted to reflect a deepening sequence. These glacial cycles imply that the climate switched twice from relatively warm to extremely cold and back during the Marinoan glaciation, associated with sea level fluctuations (Figs. 1, 2, and 4).

## **Meltwater Supply**

Glacial meltwater can be divided into three categories: meltwater on the ice sheet surface (atmospheric temperature), meltwater at the basal ice sheet (surface heat flow and pressure), and meltwater at the base of the ice shelf (seawater temperature). The meltwater can form significant

drainage on the surface, internal and base of the glacier (Irvine-Fynn et al., 2011). Some of the meltwater drainage on the ice sheet surface can reach the basal ice sheet through connected crevasses and holes inside the glacier (Skidmore and Sharp, 1999). During the ‘Snowball Earth’ event, subglacial meltwater drainage likely mainly consisted of meltwater from the basal ice sheet and the basal ice shelf, with relatively little from the ice sheet surface.

Meltwater supply is closely related to the glacier thermal regime (Paterson, 2016), which is controlled by air temperature (climate), geothermal flux, and pressure/friction (ice thickness) (Irvine-Fynn et al., 2011). When the geothermal flux and pressure are large (the glacier thickness is large), the glacier thermal regime would be warm, and there is a large amount of meltwater at the bottom of the glacier. Usually, connected meltwater drainages would occur at the warm basal ice sheet, causing the glacier to move quickly, thus depositing a large unit of glacial diamictite (Piotrowski, 1997). Conversely, the glacier thermal regime is colder when the geothermal flux and pressure are small. A cold glacier has less meltwater at the glacier base, and is mostly moved by internal ice deformation (Tranter et al., 1997). Generally, a thick ice sheet near the ice grounding line, where there is the fastest melting rate of glaciers, generates the largest amount of meltwater to form connected meltwater drainage (Lewis and Perkin, 1986). Glacial sedimentology and the relative abundance of different glacial facies can be used to interpret the thermal regime of ancient glaciers (Hambrey et al., 2012). Our sedimentary evidence above (Figs. 1b and 4) and previous studies have shown that Cryogenian glaciation with abundant diamictite may be a warm regime, leading to effective meltwater drainage in the South China region (Hu et al., 2020; Shen et al., 2021).

It is worth emphasizing that the amount of glacial meltwater supply varies with ice sheet dynamics (Hoffman et al., 2017). During the ice retreat period, the thickness of the glacier decreases and the amount of meltwater supply increases (Fig. 4). Meltwater production rates during this period may be an order of magnitude higher than the mean global runoff rate (Shields, 2005). A large amount of meltwater during this period can result in channelized meltwater drainage, which efficiently flows to the glaciomarine environment, discharging at the grounding line as focused meltstream exits (Piotrowski, 1997). During the ice advance period, the thickness of the ice sheet increases, the amount of meltwater supply decreases, and subglacial meltwater drainages are more widely distributed (Fig. 4). The distributed system is far less efficient than the channelized system, leading to longer meltwater residence times (Tranter et al., 1997).

### **Meltwater Derived-oxygen/sulfate**

During the ‘Snowball Earth’ event, the global glaciation would have effectively ceased surface water–air/land communication, resulting in the extreme suppression of chemical cycles,



including atmospheric oxygen and the continental sulfate influx (Kirschvink, 1992; Hoffman et al., 1998). However, injection of meltwater and the resultant drainage/stream generated beneath ice sheets can deliver sufficient dissolved oxygen and sulfate into the subglacial ocean (Liang et al., 2006; Anderson, 2007; Lechte et al., 2019).

Air bubbles trapped within the snow (meteoric ice) would be compressed into glacial ice (Hoffman et al., 2017). Upon melting of the glacier, either by increased air temperatures, geothermal fluxes, pressure or friction, meltwater would contain O<sub>2</sub> dissolved from the trapped air bubbles (Hoffman et al., 2017), as seen in modern Alpine glacial meltwater (Brown et al., 1994). Although this O<sub>2</sub> influx is supposed to be substantially offset by consumption of O<sub>2</sub> via either microbial or abiotic processes, such as seafloor weathering (Le Hir et al., 2008a), the remaining O<sub>2</sub> influx may be substantial (Anderson, 2007). Particularly, during the ice sheet retreat period, ice sheets melt significantly and channelized meltwater drainage is formed, and meltwater can convey O<sub>2</sub> to the subglacial environment (Jenkins, 1999), thus changing chemical properties such as seawater oxygenation (Le Hir et al., 2008a; Lechte et al., 2019).

Through a combination of friction and plucking, glaciers constantly erode the bedrock to form a large quantity of sediment, which fill the subglacial depositional space (Anderson, 2007). Due to the rapid rate of denudation and fine-textured nature of the sediments, glacial erosion produces a very high overall mineral surface area. The substantial mineral surface area from glacial erosion significantly accelerates subglacial chemical weathering, and delivers a large amount of dissolved ions into glacial seawater via meltwater (Armstrong, 1971). For many glaciers, such as the Cascade Glacier, the ion influx related to subglacial weathering has been measured. These studies show that the total ion influx during the glaciation is generally in excess of the normal global mean (Hallet et al. 1996). As a major type of ion delivered into the subglacial seawater, sulfate, mainly derived from the oxidation of sulfide, accounts for about 10-25% of the total ion influx (Sharp et al. 1995; Anderson et al. 2000; Anderson et al. 2003). For example, at Bench Glacier (Alaska) on metamorphic sedimentary rocks, sulfate from the oxidation of sulfides accounts for 23% of the total ion influx into the ocean (Anderson et al. 2000). Thus, meltwater derived sulfate likely provided a significant flux to the Cryogenian subglacial ocean (Anderson, 2007; Hoffman et al., 2017).

Because the amount of meltwater discharge exerts an important control on subglacial oxygen (Liang et al., 2006; Lechte et al., 2019) and dissolved ion influx (Collins & MacDonald, 2004), it is most instructive to consider oxygen and sulfate fluxes as a function of water discharge (Anderson, 2007). With the glaciation dynamics and the associated dynamic meltwater supply, the delivery of dissolved oxygen and sulfate from meltwater generated beneath ice sheets varies with the ice advance and retreat (Fig. 4).

## **Text S3: Materials and Methods**

### **Sample Description and Preparation**

Samples for analysis of pyrite morphology, Fe-speciation, TOC and pyrite Fe-S isotopes were collected throughout the Nantuo Formation in the ZK01 core section of the Yangtze block, South China. Fragments of core samples were divided into two sub-samples, one for thin-section and handpicking of pyrite grains, and the other for geochemical analyses.

Thin-sections (polished, 0.5-mm-thick) were used to investigate pyrite morphology. Pyrite, which is evident as larger euhedral grains in hand specimen (Fig. S2), is abundantly distributed throughout the Nantuo Formation. Under the optical and scanning electron microscope (SEM), pyrite morphologies vary, and include euhedral, subhedral, aggregates, disseminated pyrite and pyrite framboids (Figs. 2 and S2). A sample can contain more than one pyrite type, but euhedral and subhedral pyrite represent the dominant morphologies. The euhedral and subhedral pyrite are dominated by square and triangular pyrite, indicating a likely diagenetic origin. By contrast, detrital pyrite, which would be expected to have rounded grain boundaries, was not observed in the Nantuo Formation.

Prior to geochemical analyses of Fe-speciation and TOC, the matrix was sampled (finer grained sediments) in the bulk-rock samples to avoid larger clasts. Then, the matrix was powdered to <74  $\mu\text{m}$  and preserved in a desiccator after being dried at 80°C for 3 h.

### **Total Organic Carbon (TOC)**

TOC was determined at the State Key Laboratory of Petroleum Resources and Prospecting, China. To remove carbonate minerals, an appropriate amount of 10% HCl was used to dissolve the powdered matrix sample (about 0.5 g). The residue was washed with ultrapure water and then dried in a desiccator for 10 h at 60°C, followed by combustion at 900°C to oxidize organic carbon in a pure oxygen atmosphere. The resultant carbon dioxide was subsequently measured to provide the TOC data, using a LECO CS-230 carbon analyzer, and the detailed analytical procedure can be found in Zhao (2019).

### **Iron Speciation**

Total iron ( $\text{Fe}_\text{T}$ ) can be divided into three fractions: highly reactive iron ( $\text{Fe}_\text{HR}$ , representing the Fe fraction that is potentially reactive towards sulfidation in the water column and during

diagenesis; Poulton and Canfield, 2011), poorly reactive iron ( $\text{Fe}_{\text{PR}}$ ), and unreactive iron ( $\text{Fe}_{\text{U}}$ ).  $\text{Fe}_{\text{HR}}$  includes: (1) iron associated with carbonate minerals ( $\text{Fe}_{\text{carb}}$ ; siderite, ankerite); (2) ferric (oxyhydr)oxide minerals ( $\text{Fe}_{\text{ox}}$ ; ferrihydrite, lepidocrocite, goethite, hematite); (3) magnetite ( $\text{Fe}_{\text{mag}}$ ); and (4) Fe sulfide ( $\text{Fe}_{\text{py}}$ ; pyrite) (Poulton and Canfield, 2005; Poulton and Canfield, 2011). Iron speciation analyses were performed at the University of Leeds, UK. Total Fe was extracted using a standard multi-acid digestion ( $\text{HNO}_3\text{--HCl--HF}$ ) (Alcott et al., 2020), and the sequential extraction of  $\text{Fe}_{\text{carb}}$ ,  $\text{Fe}_{\text{ox}}$  and  $\text{Fe}_{\text{mag}}$  was performed according to Poulton and Canfield (2005). All Fe concentrations were determined by atomic absorption spectrometry (AAS).  $\text{Fe}_{\text{py}}$  was extracted and measured at China University of Geosciences, Wuhan, via the chromous chloride reduction method of Canfield et al. (1986), with concentrations determined gravimetrically following precipitation of  $\text{H}_2\text{S}$  as  $\text{Ag}_2\text{S}$ . Accuracy and precision of all Fe phases was ensured by replicate extractions of international Fe speciation standard (Alcott et al., 2020), with a relative standard deviation of  $< 5\%$  for all Fe pools.

## Pyrite Sulfur Isotopes

Prior to sulfur isotope analysis, optical and scanning electron microscopy (SEM) were used to choose the pyrite crystals, and euhedral grains ( $> 50\ \mu\text{m}$ ) were selected. Thin sections with eligible pyrite grains were set into a sample cell coupled to the test instrument. Determination of sulfur isotope compositions was carried out by spot analysis, using a LA-MC-ICP-MS at the State Key Laboratory for Mineral Deposits Research, China, comprising a New Wave<sup>TM</sup> ArF excimer laser ablation system (UP-193FX, 193 nm, Fremont, America) coupled with a Neptune plus MC-ICP-MS (Thermo Fisher Scientific<sup>TM</sup>, Bremen, Germany). The operational conditions of the laser system and the MC-ICP-MS are from Zhu et al. (2016, 2017). An in-house pyrite standard (WS-1 with a  $\delta^{34}\text{S}_{\text{V-CDT}}$  value of  $0.3 \pm 0.1\text{‰}$ , Zhu et al., 2016, 2017) was measured before and after each sample to calibrate the mass bias for S isotopes. In situ S isotope measurements were performed at medium mass resolution mode (Zhu et al., 2016, 2017).

## Pyrite Iron Isotopes

Based on systematic observation of pyrite morphology, handpicking of large euhedral pyrite grains was carried out and the pyrite grains were cleaned ultrasonically in purified Milli-Q  $\text{H}_2\text{O}$ . About 10 mg handpicked pyrite grains were weighed in a beaker and digested using an acid mixture of ultra-pure concentrated HCl and  $\text{HNO}_3$  at  $120^\circ\text{C}$ . After evaporation of the HCl and  $\text{HNO}_3$ , the precipitate was dissolved and evaporated in 0.5 mL concentrated HCl three times. Then the remaining precipitate was diluted in 1.0 mL 6 N HCl. The solution for Fe extraction

was purified using AGMP-1 resin, with polyethylene material as the exchange column ( $\Phi 6.8$  mm $\times$ 43 mm). The specific steps of AGMP-1 resin to separate iron in solution are described in Tang (2006a and 2006b). Measurement of Fe isotopes was performed on a Nu–MC–ICP–MS at the MLR Key Laboratory of Deep-Earth Dynamics, Institute of Geology, Chinese Academy of Geological Sciences. Specific method details are provided in Zhu (2002), Zhao (2012), and Fan (2014). Fe isotope values are reported in the standard notation as  $\delta^{56}\text{Fe}$  deviation from IRMM-014. In order to monitor the accuracy of the  $\delta^{56}\text{Fe}$  measurement, both international standard (BHVO-2) and a Chinese standard (CAGSR) were measured together with our samples. The external reproducibility was better than  $\pm 0.10\text{‰}$  (Zhao et al., 2012; Fan et al., 2014).

## **Text S4: Background and Interpretation of Geochemical Data**

### **Fe-Speciation**

Fe-speciation is a commonly used proxy for reconstructing seawater redox state.  $\text{Fe}_{\text{HR}}/\text{Fe}_{\text{T}}$  ratios  $> 0.38$  generally indicate water column anoxia (Raiswell and Canfield, 1998; Canfield et al., 2008; Poulton and Canfield, 2011), whereas ratios in ancient rocks deposited under oxic conditions are generally significantly lower ( $0.14 \pm 0.08$ ; Poulton and Raiswell, 2002). However, due to inherent variability in the source rocks deposited in a particular region, wherever possible, an oxic baseline should be derived for the precise rocks being analysed (Raiswell et al., 2008; Poulton, 2021). Values between the oxic baseline and 0.38 are considered equivocal, as rapid deposition (as would likely be the case for the Nantuo Formation diamictites) or post-depositional conversion of unsulfidized  $\text{Fe}_{\text{HR}}$  to poorly reactive Fe minerals may lessen depositional  $\text{Fe}_{\text{HR}}/\text{Fe}_{\text{T}}$  ratios (Raiswell and Canfield, 1998; Poulton and Raiswell, 2002). In the case of equivocal  $\text{Fe}_{\text{HR}}/\text{Fe}_{\text{T}}$  ratios, additional evidence (e.g.,  $\delta^{56}\text{Fe}_{\text{py}}$  values) may allow oxic and anoxic deposition to be distinguished. Where samples are considered to have been deposited under anoxic conditions,  $\text{Fe}_{\text{py}}/\text{Fe}_{\text{HR}}$  ratios can be used to provide further insight into seawater redox state, whereby  $\text{Fe}_{\text{py}}/\text{Fe}_{\text{HR}}$  ratios  $> 0.6$ – $0.8$  indicate euxinic conditions (Raiswell and Canfield, 1998; Poulton and Canfield, 2005; Poulton, 2021) and  $\text{Fe}_{\text{py}}/\text{Fe}_{\text{HR}}$  ratios  $< 0.6$  indicate ferruginous conditions (anoxic, Fe(II)-containing; Poulton et al., 2004; Poulton, 2021).

## Pyrite Sulphur Isotopes

The S isotope composition ( $\delta^{34}\text{S}$ ) of sedimentary pyrite is mainly controlled by the S isotope composition of seawater sulfate and isotopic fractionation between sulfate and sulfide, both of which are essential for understanding the global sulfur cycle and pyrite S isotope systematics. Generally,  $\text{SO}_4^{2-}$  concentrations in sediments or water column have the greatest impact on sulfur isotope fractionations observed in sedimentary pyrite. When sulfate is present in abundance, microbial sulfate reduction (MSR) can lead to sulfur isotope fractionations of up to 40‰ (Fig. S4). When  $\text{SO}_4^{2-}$  concentrations are lower, the isotopic fractionation between  $\text{SO}_4^{2-}$  and  $\text{H}_2\text{S}$  may decrease. For example, when the  $\text{SO}_4^{2-}$  concentration is lower than 200  $\mu\text{M}$ , MSR has been shown to limit the extent of sulfur isotope fractionation (Habicht et al., 2002).

Seawater sulfate, a key factor controlling S isotope fractionation, is mainly derived from the oxidative weathering of sulfide on land, and seawater redox state exerts an influence on the burial flux of sulfur. Thus, the seawater sulfate reservoir (SSR) is closely related to the redox state of the atmosphere and ocean. In addition,  $\delta^{34}\text{S}_{\text{py}}$  can provide information about the SSR and isotopic composition of the seawater sulfate. Therefore,  $\delta^{34}\text{S}_{\text{py}}$  is an effective general indicator of the size of the SSR (e.g., Canfield, 1998). Although  $^{32}\text{S}$  is preferentially -utilized by MSR, sulfur isotope fractionation between sulfate and pyrite can become muted in the presence of limited sulfate supply - leading to the formation of pyrite enriched in  $^{34}\text{S}$ . Thus, a high  $\delta^{34}\text{S}_{\text{py}}$  value may be linked to a decrease in the SSR, which may be related to the expansion of anoxic waters and increased pyrite burial (Scott et al., 2014).

## Pyrite Iron Isotopes

The Fe isotope composition of sedimentary pyrite is controlled by the Fe isotope composition of seawater and subsequent Fe isotopic fractionations during mineral formation, both of which form the basis for explaining the  $\delta^{56}\text{Fe}_{\text{py}}$  variability observed in our samples. Seawater Fe is mainly sourced from continental weathering, riverine input, and submarine hydrothermal activity (Anbar and Rouxel, 2007), whereby (1)  $\delta^{56}\text{Fe}$  values of igneous rocks are relatively uniform, concentrating around 0.1‰ (Zhu et al., 2002; Beard et al., 2003); (2)  $\delta^{56}\text{Fe}$  values of continental weathering are slightly lower than that of igneous rocks ( $\sim -0.1\text{‰}$ ; Anbar and Rouxel, 2007); (3)  $\delta^{56}\text{Fe}$  values of the modern submarine hydrothermal fluid varies from  $-0.8\text{‰}$  to  $0\text{‰}$ . (Yamaguchi et al., 2005); (4) Suspended and dissolved iron from rivers accounts for more than 50% of the Fe source to seawater, and  $\delta^{56}\text{Fe}$  values range from  $-1.0\text{‰}$  to  $0\text{‰}$  (Beard et al., 2003; Ingri et al., 2006); (5)  $\delta^{56}\text{Fe}$  values of dissolved Fe released from marginal

sea and continental shelf sediments are close to that of igneous rocks (Severmann et al., 2006). In summary, the iron isotopic composition of different sources generally shows a certain degree of light isotope enrichment, explaining low  $\delta^{56}\text{Fe}$  values in seawater through the geological history. Sedimentary carbonate rocks are generally believed to record the  $\delta^{56}\text{Fe}$  composition of seawater (von Blanckenburg et al., 2008). Yan et al. (2011) and Fan et al. (2014; 2018) reported that the  $\delta^{56}\text{Fe}$  values of carbonate rocks in the Ediacaran Doushantuo Formation, South China, vary from  $-0.50\text{‰}$  to  $0\text{‰}$ . These  $\delta^{56}\text{Fe}$  values suggest that seawater in South China during the late Neoproterozoic era was enriched in the lighter iron isotopes. In our work, a  $\delta^{56}\text{Fe}$  seawater value of  $-0.50$  to  $0\text{‰}$  has been assumed as a basis for interpreting pyrite iron isotope systematics.

The dynamic evolution of  $\delta^{56}\text{Fe}_{\text{py}}$  in individual geologic terranes is dominantly interpreted to reflect extensive/partial oxidation of seawater and subsequent iron reduction in sediments (Zhang et al., 2015; Sawaki et al., 2017). Under oxic conditions, nearly all ferrous iron is completely oxidized to ferric (oxyhydr)oxide minerals, minimizing the iron isotopic fractionation (Fig. S4a). The ferric (oxyhydr)oxide is subsequently reduced in anoxic sediments, and may be converted into diagenetic pyrite. The pyrite formed during early diagenesis has  $\delta^{56}\text{Fe}$  values similar to, or lower than, seawater ( $-0.8$  to  $0\text{‰}$ ; Severmann et al., 2008), depending on the extent of reduction of the precursor iron (oxyhydr)oxide minerals. Under ferruginous conditions, partial oxidation of ferrous iron may commonly occur (Planavsky et al., 2012), resulting to significant iron isotopic fractionation of  $\sim 1$  to  $3\text{‰}$ , and formation of ferric (oxyhydr)oxides with high  $\delta^{56}\text{Fe}$  values (Fig. S4b). Pyrite formed through the subsequently reduction of ferric minerals during early diagenesis may display large variability in  $\delta^{56}\text{Fe}$  values, ranging from positive to negative, dependent on the  $\delta^{56}\text{Fe}$  of the precursor iron (oxyhydr)oxide minerals and the extent of their reduction (Rouxel et al., 2005; Planavsky et al., 2012). Under euxinic (anoxic and sulfidic) conditions, ferrous iron undergoes extensive removal into pyrite, likely invoking an intermediate phase of  $\text{FeS}_m$  (Fig. S4c). Butler et al. (2005) suggest a kinetic isotopic fractionation (KIE) of  $0.85 \pm 0.30\text{‰}$  ( $\delta^{56}\text{Fe}$  value) during  $\text{FeS}_m$  precipitation. Heard et al. (2020) also proposed that pyrite precipitation involves KIE, resulting in  $\text{Fe}^{2+}$  in  $\text{FeS}_2$  being enriched in the lighter isotopes relative to  $\text{Fe}^{2+}_{(\text{aq})}$ . However, as the  $\text{FeS}_m$ - $\text{Fe}^{2+}_{(\text{aq})}$  system gradually tends towards equilibrium, the kinetic fractionation value ( $\delta^{56}\text{Fe}$  value) between  $\text{Fe}^{2+}_{\text{aq}}$  and  $\text{FeS}_m$  gradually decreases, to  $< 0.3\text{‰}$ , or with no obvious fractionation (Butler et al., 2005; Guilbaud et al., 2010, 2011a, b). Thus, in this pathway of pyrite formation without an Fe (oxyhydr)oxide precursor, no significant iron isotopic fractionation occurs, and pyrite formed under euxinic conditions tend to have negative to near-zero  $\delta^{56}\text{Fe}$  values (Severmann et al., 2008).

Redox state is the most important factor to control the fractionation of iron isotopes in the surface Earth, and pyrite iron isotopes can effectively trace ancient seawater redox conditions. Prior to interpreting  $\delta^{56}\text{Fe}_{\text{py}}$  values, a possible detrital influence should be evaluated. Our detailed

petrographic investigation did not find any robust evidence for substantial detrital pyrite in the Nantuo Formation at the ZK01 core (see sample description in the Materials and Methods above). Furthermore, the broad co-variation we observe among pyrite Fe isotopes, pyrite S isotopes and Fe-speciation is difficult to be explain unless the pyrite is syngenetic/diagenetic (Fig. 3). In particular, the S isotope were from in-situ analysis of euhedral pyrite, and document progressive changes in isotopic composition that are linked to independent evaluation of water column redox conditions. This suggest that the variable Fe isotopic signatures of the Marinoan pyrite are unlikely to be related to detrital input, and instead reflect a primary signal from syngenetic/diagenetic pyrite.

## **Text S5: Alternative Hypotheses for Seawater Redox Variability**

### **Sea-level Elevation**

Sea-level elevation, by controlling fluctuations in the depth and position of the chemocline, can lead to variability in the redox state of the local seawater column, whereby sea-level falling and rising may bring the seafloor at the study site into and out of the more oxygenated surface layer of the ocean. Based on the abovementioned glaciation dynamics, ice advance and retreat are associated with sea-level falling and rising. At the study section, the lithofacies and sedimentary characteristics show two distinct ice advance-retreat cycles. For the first cycle, sea-level first falls and then rises during deposition of Units I and Unit II, respectively, bringing the study site into and out of the more oxygenated surface layer. However, all the geochemical data, including Fe-S isotopes and Fe-speciation, indicate the opposite scenario, with deoxygenation and oxygenation occurring in upper part of Unit I and Unit II, respectively (Fig. 3). Similarly, the ice advance recorded in the Unit III corresponds to seawater deoxygenation (Fig. 3). These observations suggest that the redox variability observed during the Marinoan glaciation was not caused by sea-level fluctuations.

### **Oxygen Input via Open Water**

Another possible control on the dynamic redox history concerns the periodic development of open water, leading to enhanced productivity and O<sub>2</sub> production, as well as exchange of O<sub>2</sub> between the atmosphere and ocean. There is increasing evidence for open water conditions during the Cryogenian glaciations. Ye et al. (2015) suggested that local open water conditions allowed the survival of benthic macroscopic phototrophs during the Marinoan glaciation.

Elemental characteristics, Fe-speciation, and N-isotope data from Marinoan deposits also indicated expansive regions of open water throughout one of the harshest glaciations in Earth history (Johnson et al., 2017). In addition, red beds, carbonates and shales deposited in open water or glacial lakes have been identified in the glacial deposits (Lang et al., 2018a; Bai et al., 2020; Yan et al., 2020; Shen et al., 2021).

On the one hand, open water would enhance the supply of light to fuel photosynthesis, and hence O<sub>2</sub> production via organic matter production and burial. It has been suggested that no obvious mass extinction event is observed at this time from fossil records, biomarker evidence and molecular clock data (Erwin, 2015; Ye et al., 2015), although the low-latitude glaciation has been proposed to present a formidable barrier to the survival of oceanic species (Hoffman et al., 1998). Notably, active primary productivity occurred in the glacial ocean due to the open water (Johnson et al., 2017; Ye et al., 2015). Thus, we can assume that there was a certain amount of biogenically-produced O<sub>2</sub> in the glacial ocean. However, TOC concentrations recorded in our Nantuo Formation samples are low and relatively stable across the Nantuo Formation, giving no indication, at least at the local scale, of productivity-induced changes in O<sub>2</sub> production (Fig. 3).

On the other hand, open water allows air sea-gas exchange and oxygen diffusion into the subglacial ocean (Johnson et al., 2017), which could potentially lead to variability in seawater redox conditions. From geochemical calculations and numerical modelling, gas diffusion efficiency has a positive correlation relation with the ice-free surface size of the glacial ocean, but a limited area of open water (10<sup>3</sup> km<sup>2</sup>) can lead to 90% modern efficiency, allowing an efficient gas diffusion into the ocean (Le Hir, 2008a). Thus, equilibration of the atmosphere and ocean due to local open water was likely quite rapid (Le Hir, 2008a), and the chemical properties of seawater would thus change relatively rapidly (Le Hir, 2008b). Furthermore, given that open water is unsustainable because sea ice would become globally extensive within a few thousand years (Hoffman et al., 2017), rapid shutdown of the atmospheric O<sub>2</sub> influx would occur and seawater deoxygenation directly following rapid oxidation would be observed. This could be a prevalent cause of the shorter-term redox variability observed in parts of the Nantuo succession, but appears an unlikely explanation for the longer-term trends that are more closely linked to the broader cycles of glacial advance and retreat (Fig. 3).

### **Meltwater-derived Oxygen**

As mentioned above, meltwaters can be a prominent source of oxygen to the subglacial ocean during ‘Snowball Earth’ events (Lechte et al., 2019). The geochemical evidence we present necessitates an explanation comprising well-oxygenated ice-retreat intervals and anoxic ice-advance intervals across two cycles during the Marinoan glaciation. We suggest that the most



parsimonious explanation for these data comprises variable input of oxygen and sulfate from subglacial meltwaters.

In the beginning of the first ice advance during the glaciation, the ice sheet formed, and hence atmosphere O<sub>2</sub> influx was suppressed. As the ice became thicker, the influx of meltwater and its resultant O<sub>2</sub> was limited. The transient oxic conditions during this period (lower part of Unit I) could be interpreted as the initial persistence of a well-oxygenated interglacial ocean (Li et al., 2012; Zhang et al., 2015; Peng et al., 2019). With the ongoing first ice-sheet advance, the meltwater and resultant O<sub>2</sub> influx gradually decreased, leading to rapid consumption of seawater sulfate and the oxygen inventory. As a result, deoxygenation occurred and the previous oxic conditions transited to anoxic/ferruginous conditions, albeit with fluctuations in redox state through upper part of Unit I (Fig. 3).

When the first ice-sheet retreat occurred, anoxic/ferruginous conditions initially persisted through Unit II (Fig. 3). This increase in oxygenation occurred as the ice experienced its maximum retreat, which was accompanied by an increasingly warm climate, leading to an abundant influx of meltwater and subglacial water-filled rivers/streams containing O<sub>2</sub> (Anderson, 2007; Hoffman et al., 2017).

The increase in oxygenation during the ice-sheet retreat period continued during the onset of the second ice sheet advance, but it is terminated by the ongoing of the ice sheet advance. The oxic conditions, interpreted by the finality of the previous seawater oxygenation, evolved into anoxic/ferruginous conditions as the oxygenation level gradually decreased (Fig. 3). With the ongoing of the second ice sheet advance, the climate turned colder and the ice sheet achieved its maximum extent, thus decreasing the oxygen influx from meltwaters. In parallel, oxygen and sulfate would have been consumed from the water column by microbial and abiotic processes, leading to the development of anoxic/ferruginous conditions (Unit III).

The second ice retreat then occurred, with a substantial influx of sulfate leading to the development of euxinic conditions recorded in Unit IV (Fig. 3). During this interval, enhanced meltwater could have delivered abundant O<sub>2</sub> into the ocean. Nevertheless, a significant increase in continental weathering, as proposed by the Mg isotopes (Huang et al., 2016), could have consumed oxygen through oxidative weathering, and also delivered nutrients, ultimately resulting in the development of water column euxinia (Lang et al., 2018b).

## **Spatial Significance**

Our  $\delta^{56}\text{Fe}_{\text{py}}$  and  $\delta^{34}\text{S}_{\text{py}}$  data, as well as the Fe-speciation, record secular variability in seawater redox state during the Marinoan glaciation (Fig. 3). The secular variability in seawater redox state, although may be explained by a combination of meltwater-derived O<sub>2</sub> enhanced,

productivity and O<sub>2</sub> production, as well as exchange of O<sub>2</sub> between the atmosphere and ocean, is evident in concert with the waxing and waning of the ice sheet (Fig. 4). The above-mentioned glaciation dynamics show the waxing and waning of the ice sheet, as well as the dynamic meltwater-derived O<sub>2</sub> influx, are tightly related to the temperature fluctuations and sea level evolution. Thus, the seawater redox variations deduced from those apparent regional proxies are actually controlled by global events, and as such they are of widespread significance.

(a)

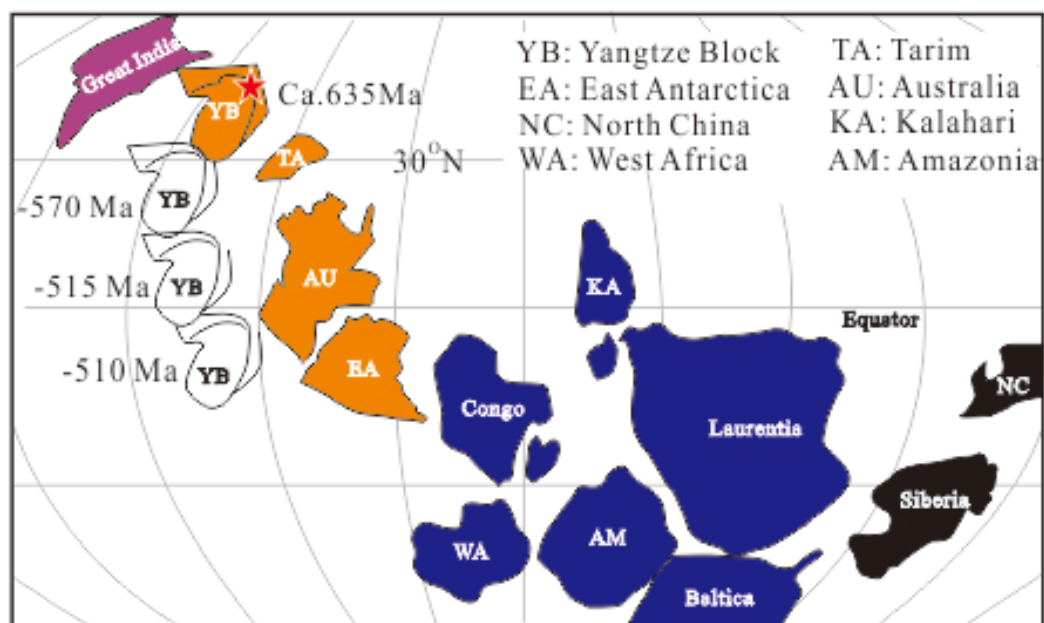

(b)

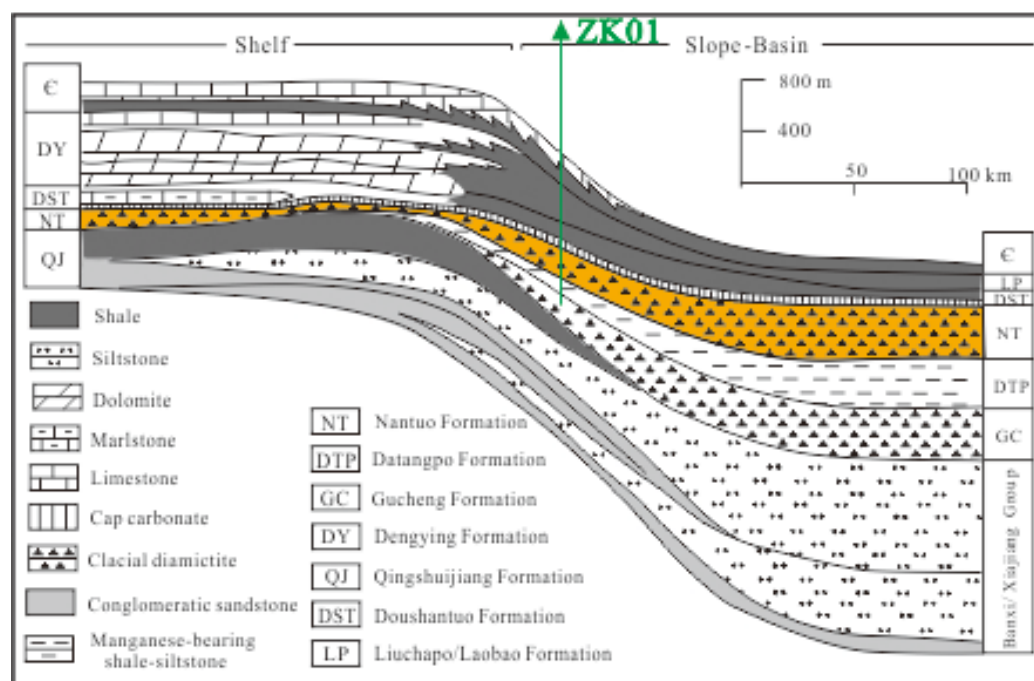

**Figure S1. Global reconstruction of the location of the Yangtze block and stratigraphic division of the Neoproterozoic transect in the Yangtze block.** (a) Global reconstruction of the location of the Yangtze block at ca. 635 Ma and drift trajectory from ca. 635 to ca. 510 Ma (simplified from Zhang et al., 2015). (b) Stratigraphic division of the Neoproterozoic transect from north to south in the Yangtze block (modified from Jiang et al., 2011). Location of drill core ZK01 can be seen in Fig. 1a.

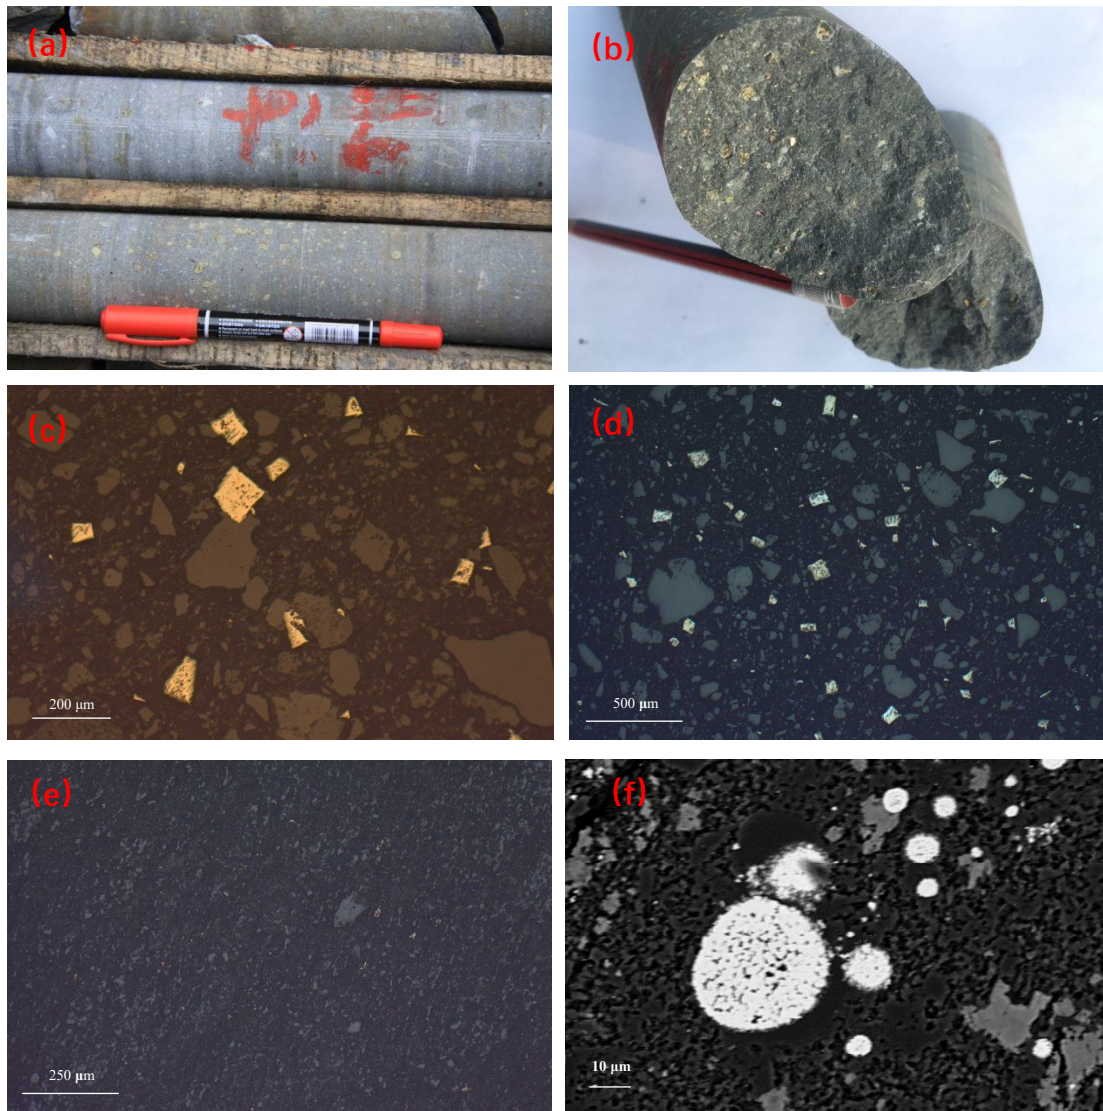

**Figure S2. Morphology of pyrite for Nantuo Formation in South China.** (a) and (b) show coarse-grained pyrite in hand specimen; (c) and (d) show euhedral pyrite under reflected light. (e) show disseminated pyrite under reflected light; (f) shows pyrite framboids under scanning electron microscope.



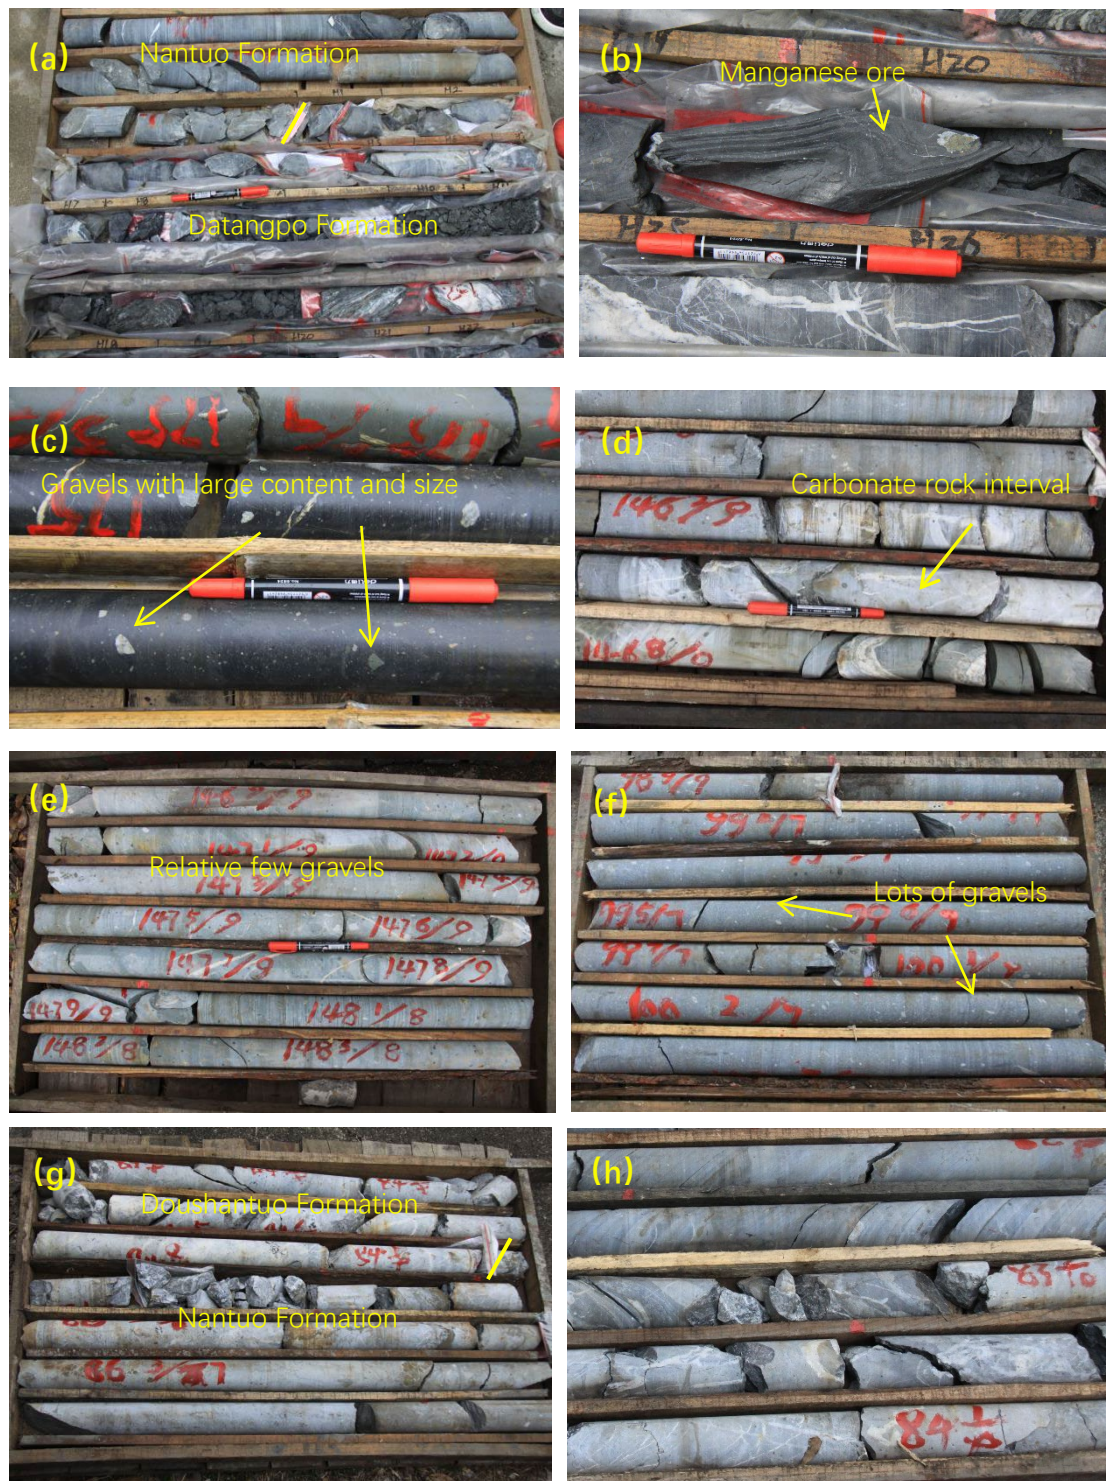

**Figure S3. Photographs showing lithofacies of the Nantuo Formation from the ZK01 core section. (a) Nantuo Formation conformable over the interglacial Datangpo Formation. (b) Manganese ore in the Datangpo Formation. (c) Diamictite lithofacies in the first lithological cycle. (d) Carbonate rock intervals between the two lithological cycles. (e) and (f), Diamictite lithofacies with small and large gravel size/content**

in the second lithological cycle. (g) Nantuo Formation conformably underlies the postglacial Doushantuo Formation. (h) Cap carbonate in the Doushantuo Formation.

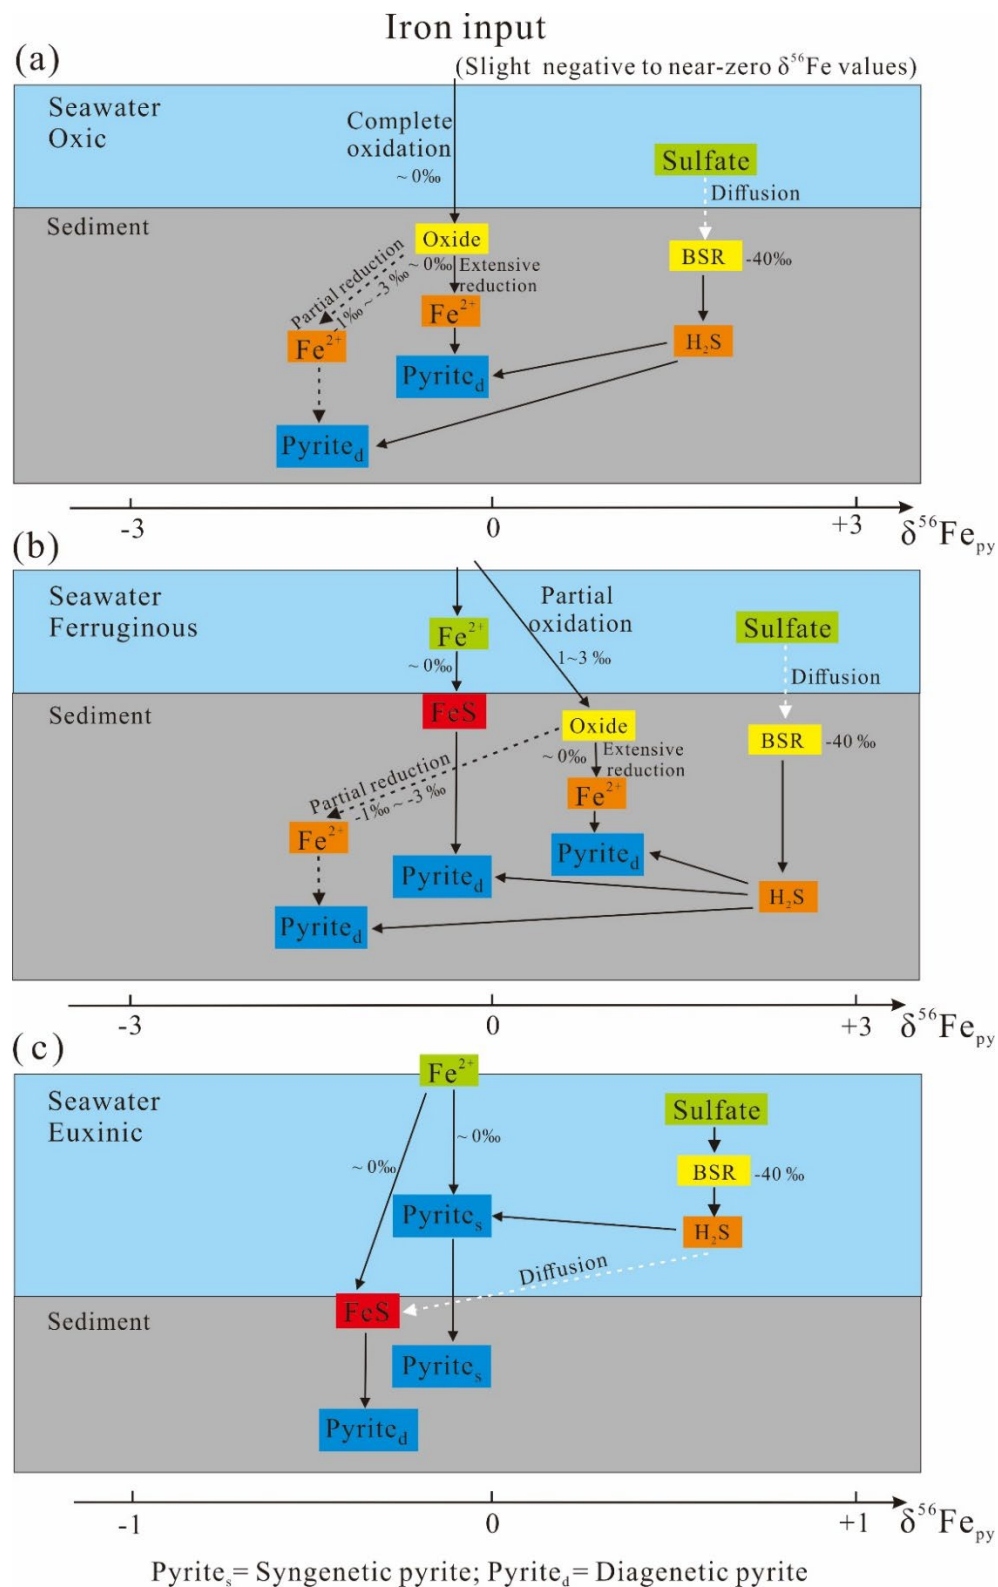

**Figure S4.** Model showing pyrite formation in the water column and sediments under **(a)** oxic, **(b)** ferruginous, and **(c)** euxinic conditions.



## References Cited

- Alcott, L. J., Krause, A. J., Hammarlund, E. U., 2020. Development of iron speciation reference materials for paleoredox analysis: *Geostandards and Geoanalytical Research* v. 44, p. 581–591.
- Allen, P.A., Etienne, J.L., 2008, Sedimentary challenge to Snowball Earth: *Nat. Geosci.* v. 1, p. 817–825.
- Allen, P.A., Leather, J., and Brasier, M.D., 2004, The Neoproterozoic Fiq glaciation and its aftermath, Huqf supergroup of Oman: *Basin Res.*, v. 16, p. 507–534.
- Anbar, A.D., Rouxel, O., 2007, Metal stable isotopes in paleoceanography: *Annu. Rev. Earth Planet. Sci.*, v. 35, p. 717–746.
- Anderson, S.P., 2007. Biogeochemistry of Glacial Landscape Systems: *Annu. Rev. Earth Planet. Sci.* v.35, p. 375–99.
- Anderson, S.P., Drever, J.I., Frost, C.D., Holden, P., 2000, Chemical weathering in the foreland of a retreating glacier: *Geochim. Cosmochim. Acta.* v. 7, p. 1173–89
- Anderson, S.P., Longacre, S.A., Kraal, E.R., 2003, Patterns of water chemistry and discharge in the glacier-fed Kennicott River, Alaska: evidence for subglacial water storage cycles: *Chem. Geol.*, v. 3–4, p. 297–312
- Armstrong, R.L., 1971, Glacial erosion and the variable isotopic composition of strontium in sea water: *Nature*, v. 230, p. 132–33
- Arnaud, E., Eyles, C.H., 2006, Neoproterozoic environmental change recorded in the Port Askaig Formation, Scotland: Climatic vs tectonic controls: *Sedimentary Geology*, v. 183, p. 99–124.
- Bai, H.Q., Liu, Y.Q., Peng, N. Kuang, H.W., and Wang, Y.C., 2020, Marinoan-aged red beds at Shennongjia, South China: Evidence against global-scale glaciation during the Cryogenian: *Palaeogeography, Palaeoclimatology, Palaeoecology*, v. 559 109967. doi:10.1016/j.palaeo.2020.109967.
- Bao, X., Zhang, S., Jiang, G., Wu, H., Li, H., and Wang, X., 2018, Cyclostratigraphic constraints on the duration of the Datangpo Formation and the onset age of the Nantuo (Marinoan) glaciation in South China: *Earth Planet. Sci. Lett.*, v. 483, p. 52–63.
- Beard, B.L., Johnson, C.M., Von Damm, K.L., Poulson, R.L., 2003, Iron isotope constraints on Fe cycling and mass balance in oxygenated Earth oceans: *Geology*, v. 7, p. 629.
- Boulton, G. S., Deynoux, M., 1981, Sedimentation in glacial environments and the identification of tills and tillites in ancient sedimentary sequences: *Precambrian Research*, v. 15, p. 397–422.
- Boyle, R.A., Lenton, T.M., Williams, H.T.P., 2007, Neoproterozoic ‘snowball Earth’ glaciations and the evolution of altruism: *Geobiology*, v. 5, p. 337–349
- Brodzikowski, K., Van Loon, A., 1987, A systematic classification of glacial and periglacial environments, facies and deposits: *Earth–Science Reviews*, p. 297–381.
- Brown, G., Tranter, M., Sharp M., Davies T., and Tsiouris S., 1994, Dissolved oxygen variations in Alpine glacial meltwaters: *Earth Surface Processes and Landforms*, v. 19, p. 247–253.
- Butler, I.B., Archer, C., Vance, D., Oldroyd, A., Rickard, D., 2005, Fe isotope fractionation on FeS formation in ambient aqueous solution: *Earth Planet. Sci. Lett.*, v. 236, p. 430–442.

- Canfield, D.E., 1998, A new model for Proterozoic ocean chemistry: *Nature*, v. 396, p. 450–452
- Canfield, D.E., Poulton, S.W., Knoll, A.H., et al., 2008, Ferruginous Conditions Dominated Later Neoproterozoic Deep–Water Chemistry: *Science*, v. 321, p. 949–952.
- Canfield D.E., Raiswell R., Westrich J.T., Reaves C.M. and Berner R. A., 1986, The use of chromium reduction in the analysis of reduced inorganic sulfur in sediments and shales: *Chem. Geol.* V. 54, p. 149–155.
- Condon, D.J., Zhu, M.Y., Bowring, S., Wang, W., Yang A.H., and Jin, Y.G., 2005, U–Pb ages from the Neoproterozoic Doushantuo Formation, China: *Science* v. 308, p. 95–98.
- Collins, D.N., MacDonald, O.G., 2004, Year–to–year variability of solute flux in meltwaters draining from a highly–glacierized basin: *Nordic Hydrol.*, v. 4–5, p. 359–67
- Chumakov, N.M., 2009, Neoproterozoic glacial events in Eurasia. In: Gaucher, C., Sial, A.N., Halverson, G.P., Frimmel, H.E. (Eds.): *Neoproterozoic–Cambrian Tectonics, Global Change and Evolution: a focus on southwestern Gondwana. Developments in Precambrian Geology* 16, Elsevier, pp. 389–403.
- Erwin, D. H., 2015, Early metazoan life: Divergence, environment and ecology: *Philos. Trans. R. Soc. Lond. B Biol. Sci.*, v. 370, p. 36.
- Fan, H.F., Wen, H.J., Zhu, X.K., Feng, L.J., and Chang, H.J., 2018, Oceanic redox condition during the late Ediacaran (551–541 Ma), South China: *Geochimica et Cosmochimica Acta*, v. 238, p. 343–356.
- Fan, H.F., Zhu, X.K., Wen, H.J., Yan, B., Li, J., and Feng, L.J., 2014, Oxygenation of Ediacaran Ocean recorded by iron isotopes: *Geochim. Cosmochim. Acta*, v. 140, p. 80–94.
- Gu S., Fu Y. and Long J., 2019, Predominantly Ferruginous Conditions in South China during the Marinoan Glaciation: Insight from REE Geochemistry of the Syn–glacial Dolostone from the Nantuo Formation in Guizhou Province, China: *Minerals*, v. 9.
- Guilbaud, R., Butler, I.B., Ellam, R.M., Rickard, D., Oldroyd, A., 2011a. Experimental determination of the equilibrium Fe isotope fractionation between  $\text{Fe}^{2+}_{\text{aq}}$  and  $\text{FeS}_m$  (mackinawite) at 25 and 2°C: *Geochim. Cosmochim. Acta*, v. 75, p. 2721–2734.
- Guilbaud, R., Butler, I.B., Ellam, R.M. 2011b. Abiotic pyrite formation produces a large Fe isotope fractionation: *Science*, v. 332, p. 1548–1551.
- Guilbaud, R., Butler, I.B., Ellam, R.M., Rickard, D., 2010, Fe isotope exchange between  $\text{Fe(II)}_{\text{aq}}$  and nanoparticulate mackinawite ( $\text{FeS}_m$ ) during nanoparticle growth: *Earth Planet. Sci. Lett.*, v. 300, p. 174–183.
- Habicht, K.S., Gade, M., Thamdrup, B., Berg, P., Canfield, D.E., 2002, Calibration of Sulfate Levels in the Archean Ocean: *Science*, v. 298, p. 2372–2374.
- Hambrey, M.J., Glasser, N. F., 2012, Discriminating glacier thermal and dynamic regimes in the sedimentary record: *Sedimentary Geology*, p. 1–33.
- Hallet, B., Hunter, L., Bogen, J., 1996, Rates of erosion and sediment evacuation by glaciers: a review of field data and their implications: *Global Planet. Change*, v. 12, p. 213–35

- Halverson, G.P., Maloof, A.C., Hoffman, P.F., 2004, The Marinoan glaciation (Neoproterozoic) in Svalbard: *Basin Res.*, v. 16, p. 297–324.
- He, J.Y., Xu, B., Meng, X.Y., Kou, X.W., Liu, B., Wang, Y., Mi, H., 2007, Neoproterozoic sequence stratigraphy and correlation in Quluqtagh area, Xinjiang: *Acta Petrologica Sinica*, v. 7, p. 1645–1654.
- Heard, A.W., Dauphas, N., Guilbaud, R., Rouxel, O.J., Butler I.B., Nie, N.X., Bekker, A., 2020, Triple iron isotope constraints on the role of ocean iron sinks in early atmospheric oxygenation, *Science*, v. 370, p. 446–449.
- Hoffman, P.F., Schrag, D.P., 2002, The snowball Earth hypothesis: testing the limits of global change: *Terra Nova*, v. 14, p. 129–155.
- Hoffman, P.F., Kaufman, A.J., Halverson, G.P., Schrag, D.P.A., 1998, Neoproterozoic Snowball Earth: *Science*, v. 281, p. 1342–1345.
- Hoffman, P.F., Abbot, D.S., Ashkenazy, Y., Benn, D.I., Brocks, J.J., Cohen, P.A., Cox, G. M., Creveling, J.R., Donnadieu, Y., Erwin, D.H., Fairchild, I.J., Ferreira, D., Goodman, J.C., Halverson, G.P., Jansen, M.F., Le Hir, G., Love, G.D., Macdonald, F. A., Maloof, A.C., Partin, C.A., Ramstein, G., Rose, B.E.J., Rose, C.V., Sadler, P.M., Tziperman, E., Voigt, A., Warren, S.G., 2017a, Snowball Earth climate dynamics and Cryogenian geology–geobiology: *Sci. Adv.* v. 3, p. 1–43.
- Hoffman, P.F., Lamothe, K.G., LoBianco, S.J.C., Hodgskiss, M.S.W., Bellefroid, E.J., Johnson, B.W., Hodgins, E.B., and Halverson, G.P., 2017b. Sedimentary depocenters on Snowball Earth: Case studies from the Sturtian Chuos Formation in northern Namibia: *Geosphere*, v. 13, p. 811–837.
- Hu, C.L., Zhu, M.Y., 2020, Lithofacies and glacio–tectonic deformation structures of the Tiesi’ao/Dongshanfeng Formation on the Yangtze Block, South China: Implications for Sturtian Glaciation dynamics: *Palaeogeography, Palaeoclimatology, Palaeoecology*, <https://doi.org/10.1016/j.palaeo.2019.109481>.
- Huang, K.J., 2016, Episode of intense chemical weathering during the termination of the 635–Ma Marinoan glaciation. *Proc. Natl Acad. Sci.* v. 113, p. 14904–14909.
- Hyde, W.T., Crowley, T.J., Baum, S.K., Peltier, W.R., 2000, Neoproterozoic ‘snowball Earth’ simulations with a coupled climate/ice–sheet model: *Nature*, v. 405, p. 425–429.
- Ingri, J., Malinovsky, D., Rodushkin, I., et al. 2006, Iron isotope fractionation in river colloidal matter: *Earth and Planetary Science Letters*, v. 245, p. 792–798.
- Irvine-Fynn, T. D., Hodson, A. J., Moorman, B. J., Vatne, G., Hubbard, A. L., 2011, Polythermal glacier hydrology: A review. *Reviews of Geophysics*, v. 4, p. RG4002.
- Jenkins, A., 1999, The impact of melting ice on ocean waters: *Journal of Physical Oceanography*, v. 29, p. 2370–2381.
- Jiang, G.Q., Shi, X.Y., Zhang, S.H., Wang, Y., and Xiao, S.H., 2011, Stratigraphy and paleogeography of the Ediacaran Doushantuo Formation (ca. 635–551 Ma) in South China: *Gondwana Research*, v. 19, p. 831–849.

- Johnson, B.W., Poulton, S.W., and Goldblatt, C., 2017, Marine oxygen production and open water supported an active nitrogen cycle during the Marinoan Snowball Earth: *Nature Communication*, v. 8, p. 1316–1322.
- Kirschvink, J.L., 1992, Late Proterozoic low-latitude global glaciation: the snowball Earth. In: *The Proterozoic Biosphere: a multidisciplinary study*: Cambridge University Press, New York, pp. 51–52.
- Łabaj, M.A., and Pratt, B.R., 2016, Depositional dynamics in a mixed carbonate–siliciclastic system: middle–upper Cambrian Abrigo Formation, Southeastern Arizona, U.S.A: *J. Sediment. Res.*, v. 86, p. 11–37.
- Lan, Z., Li, X.H., Zhang, Q., and Li, Q.L., 2015, Global synchronous initiation of the 2<sup>nd</sup> episode of Sturtian glaciation: SIMS zircon U–Pb and O isotope evidence from the Jiangkou Group, South China: *Precambr. Res.*, v. 267, p. 28–38.
- Lang, X.G., Shen, B., Peng, Y.B., Xiao, S.H., Zhou, C.M., Bao, H.M., Kaufman, A.J., Huang, K.J., Crockford, P.W., Liu, Y.G., Tang, W.B., and Ma, H.R., 2018b, Transient marine euxinia at the end of the terminal Cryogenian glaciation: *Nature communication*, v. 9, p. 3019.
- Lang, X.G., Chen, J.T., Cui, H., Man, L. Huang, K.J., Fu, Y., Zhou, C.M., and Shen, B., 2018a, Cyclic cold climate during the Nantuo Glaciation: Evidence from the Cryogenian Nantuo Formation in the Yangtze Block, South China: *Precambr. Res.*, v. 310, p. 243–255.
- Lechte, M.A., Wallace, M.W., Hood, A.S., Li, W.Q., and Planavsky, N.J., 2019, Subglacial meltwater supported aerobic marine habitats during Snowball Earth: *Proc. Natl. Acad. Sci.*, v. 51, p. 25478–25483.
- Le Heron, D.P., Busfield, M.E., Prave, A.R., 2014, Neoproterozoic ice sheets and olistoliths: multiple glacial cycles in the Kingston Peak Formation California: *J. Geol. Soc.*, v. 171, p. 525–538.
- Le Hir, G., Ramstein, G., Donnadieu, Y., and Godd  ris, Y., 2008a, Scenario for the evolution of atmospheric pCO<sub>2</sub> during a snowball earth: *Geology*, v. 36, p. 47–50.
- Le Hir, G., Godderis, Y., Donnadieu, Y., Ramstein, G., 2008b, A geochemical modelling study of the evolution of the chemical composition of seawater linked to a “snowball” glaciation: *Biogeosciences*, v. 5, p. 253–267.
- Lewis, E., Perkin, R., 1986, Ice pumps and their rates. *Journal of Geophysical Research: Oceans*, p. 11756–11762.
- Li, C., Love, G.D., Lyons, T.W., Scott, C.T., Feng, L.J., Huang, J., Chang, H.J., Zhang, Q.R., Chu, X.L., 2012, Evidence for a redox stratified Cryogenian marine basin, Datangpo Formation, South China: *Earth and Planetary Science Letters*, v. 331–332, p. 246–256
- Liu, Y.G., Yang, J., Bao, H.M., Shen, B., Hu, Y.Y., 2020, Large equatorial seasonal cycle during Marinoan snowball Earth. *Sci. Adv.* 23, eaay2471. <https://doi.org/10.1126/sciadv.aay2471>.
- Naish, T., et al., 2009, Obliquity–paced Pliocene West Antarctic ice sheet oscillations: *Nature*, v. 458, p. 322.
- Paterson S. B., *The physics of glaciers* (Elsevier, 2016).
- Peng, X. Zhu, X.K., Shi, F.Q., Yan, B., Zhang, F.F., Zhao, N.N., Peng, P.A., Li, J., Wang, D., and Shields, G.A., 2019, A deep marine organic carbon reservoir in the non–glacial Cryogenian ocean (Nanhua Basin,

- South China) revealed by organic carbon isotopes: *Precambrian Research*, v. 320, p. 212–220.
- Piotrowski, J. A., 1997, Subglacial hydrology in north–western Germany during the last glaciation: groundwater flow, tunnel valleys and hydrological cycles: *Quaternary Science Reviews*, v. 82, p. 169–185.
- Planavsky, N., Rouxel, O.J., Bekker, A., Hofmann, A., Little, C.T.S., and Lyons, T.W., 2012, Iron isotope composition of some Archean and Proterozoic iron formations: *Geochimica et Cosmochimica Acta*, v. 80, p. 158–169.
- Poulton, S.W., Fralick, P.W., Canfield, D.E., 2004, The transition to a sulphidic ocean~1.84 billion years ago: *Nature*, v. 431, p. 173–177.
- Poulton, S.W., Canfield, D.E., 2011, Ferruginous Conditions: A Dominant Feature of the Ocean through Earth's History: *Elements*, v. 7, p. 107–112.
- Poulton, S. W., and Canfield, D. E., 2005, Development of a sequential extraction procedure for iron: implications for iron partitioning in continentally derived particulates: *Chem. Geol.*, p. 209–221.
- Poulton, S. W., and Raiswell, R., 2002, The low-temperature geochemical cycle of iron: From continental fluxes to marine sediment deposition. *American Journal of Science*, v. 302, p. 774–805
- Poulton, S. W., 2021, The Iron Speciation Paleoredox Proxy: *Elements in Geochemical Tracers in Earth System Science*: New York, Cambridge University Press, 1–19 p.
- Raiswell, R., and Canfeld, D.E., 1998, Sources of iron for pyrite formation in marine sediments: *American journal of science*, v. 298, p. 219–245.
- Raiswell, R., Newton, R., Bottrell, S.H., Coburn, P.M., Briggs, D.E.G., Bond, D.P.G., Poulton, S.W., 2008. Turbidite depositional influences on the diagenesis of Beecher's Trilobite Bed and the Hunsrück Slate; sites of soft tissue pyritization. *Am. J. Sci.*, v. 308, p. 105–129.
- Rooney, A.D., Strauss, J.V., Brandon, A.D., Macdonald, F.A., 2015, A Cryogenian chronology: Two long–lasting synchronous Neoproterozoic glaciations: *Geology*, v. 43, p. 459–462.
- Rouxel, O.J., Bekker, A., and Edwards, K., 2005, Iron isotope constraints on the Archean and Paleoproterozoic ocean redox state: *Science*, v. 307, p. 1088–1091.
- Schmitz, M.D., 2012, Appendix 2—Radiometric ages used in GTS3012, in Gradstein, F., Ogg, J., Schmitz, M.D., and Ogg, G., eds., *The Geologic Time Scale 2012*: Boston, Elsevier, p.1045–1082.
- Scott, C., Wing, B.A., Bekker, A., Planavsky, N.J., Medvedev, P., Bates, S.M., Yun, M., and Lyons, T.W., 2014, Pyrite multiple-sulfur isotope evidence for rapid expansion and contraction of the early Paleoproterozoic seawater sulfate reservoir: *Earth and Planetary Science Letters*, v. 389, p. 95– 104.
- Severmann, S., Johnson, C. M., Beard, B. L., McManus, J. 2006, The effect of early diagenesis on the Fe isotope compositions of porewaters and authigenic minerals in continental margin sediments: *Geochim. Cosmochim. Acta*, v. 70, p. 2006–2022.
- Severmann, S., Lyons, T.W., Anbar, A., McManus, J., and Gordon, G., 2008, Modern iron isotope perspective on the benthic iron shuttle and the redox evolution of ancient oceans: *Geology*, v. 36, p. 487–490.

- Sharp, M., Tranter, M., Brown, G.H., Skidmore, M., 1995, Rates of chemical denudation and CO<sub>2</sub> drawdown in a glacier-covered alpine catchment: *Geology*, v. 23, p. 61–64
- Shen, W.B., Zhu, X.K., Yan, B., Qin, H.Y., Gao, Z.F., Li, F.B., 2021, Sequence stratigraphy of the Cryogenian Nantuo Formation in South China: Constraints on Marinoan glaciation dynamics: *Journal of Asian Earth Sciences*, v. 214, p. 104776.
- Shields, G. A., 2005, Neoproterozoic cap carbonates: A critical appraisal of existing models and the plumeworld hypothesis: *Terra Nova*, v. 17, p. 299–3102005.
- Skidmore, M. L., Sharp, M. J., 1999, Drainage system behaviour of a High-Arctic polythermal glacier: *Annals of Glaciology*, p. 209–215.
- Sawaki, Y., Tahata, M., Komiya, T., Hirata, T., Han, J., and Shu, D.G., 2018. Redox history of the Three Gorges region during the Ediacaran and Early Cambrian as indicated by the Fe isotope: *Geoscience Frontiers*, v. 9, p. 155-172.
- Talling P.J., Masson D.G., Sumner E.J. and Malgesini G., 2012, Subaqueous sediment density flows: Depositional processes and deposit types: *Sedimentology*, v. 59, p. 1937–2003.
- Tang, S.H., and Zhu, X.K., 2006a, Separation of some element using AG MP–1 anion exchange resin: *Geological journal of China university*, v. 3, p. 398–403.
- Tang, S.H., Zhu, X.K., Cai, J.J., Li. S.Z., He, X.X., and Wang, J.H., 2006b, Chromatographic separation of Cu, Fe and Zn using AG MP–1 anion exchange resin for isotope determination by MC–ICPMS: *Rock and mineral analysis*, v. 1, p. 5–8.
- Tostevin, R., Turchyn, A.V., Farquhar, J., et al. 2014, Multiple sulfur isotope constraints on the modern sulfur cycle, *Earth and Planetary Science Letters*, v. 396, p. 14–21
- Tranter et al., 1997, Variability in the chemical composition of in situ subglacial meltwaters: *Hydrological Processes*, p. 59–77.
- Tucker, M.E., Paul Wright, V., and Dickson, J.A.D., 1990, *Carbonate Sedimentology*. Blackwell p. 28–67.
- von Blanckenburg, F., Mamberti, M., Schoenberg, R., et al. 2008, The iron isotope composition of microbial carbonate: *Chemical Geology*, v. 249, P. 113–128.
- Wang, D., Zhu, X.K., Zhao, N.N., Yan, B., Li, X.H., Shi, F.Q., and Zhang, F.F., 2019, Timing of the termination of Sturtian glaciation: SIMS U–Pb zircon dating from South China: *J. Asian Earth Sci.*, v. 177, p. 287–294.
- Wang, J., and Li, Z.X., 2003, History of Neoproterozoic rift basins in South China: implications for Rodinia break-up: *Precambrian Research*, v. 122, p. 141–158.
- Williams, G.E., Gostin, V.A., McKirdy, D.M., Preiss, W.V., 2008, The Elatina glaciation, Late Cryogenian (Marinoan Epoch), South Australia: Sedimentary facies and palaeoenvironments: *Precamb. Res.* V. 163, P. 307–331.
- Yamaguchi, K. E., Johnson, C. M., Beard, B. L., and Ohmoto, H., 2005, Biogeochemical cycling of iron in the Archean–Paleoproterozoic Earth: constraints from iron isotope variations in sedimentary rocks from the

- Kaapvaal and Pilbara Cratons: *Chem. Geol.*, v. 218, p. 135-169.
- Yan, B., 2011, Geochemical characteristics of carbonate rocks and black shale in Doushantuo Formation of Ediacaran System, South China. Beijing: Doctoral dissertation of China University of Geosciences (Beijing).
- Yan, B., Shen, W.B., Zhao, N.N., and Zhu, X.K., 2020, Constraint on the nature of Marinoan glaciation: Cyclic sedimentary records of the Nantuo Formation, South China: *Journal of Asian Earth Sciences*, v.189, 104137 (1–13).
- Ye, Q., Tong, J.N., Xiao, S.H., Zhu, S.X., An, Z.H., Tian, L., and Hu, J., 2015, The survival of benthic macroscopic phototrophs on a Neoproterozoic snowball Earth: *Geology*, v. 43, p. 507–510.
- Zhang, F.F., Zhu, X.K., Yan, B., Kendall, B., Peng, X., Li, J., Algeo, T.J., and Romaniello, S., 2015. Oxygenation of a Cryogenian ocean (Yangtze Basin, South China) revealed by pyrite Fe isotope compositions: *Earth Planet. Sci. Lett.*, v. 429, p. 11–19.
- Zhang, Q. R., Chu, X. L., and Feng, L.J., 2011, Chapter 32 Neoproterozoic glacial records in the Yangtze Region, China. In: Arnaud, E., Halverson, G.P., Shields–Zhou, G. (Eds.), *The Geological Record of Neoproterozoic Glaciations*. vol. 36. Geological Society, London, *Memoirs*, v. 36, p. 357–366.
- Zhang, S., Jiang, G., and Han, Y., 2008, The age of the Nantuo Formation and Nantuo glaciation in South China: *Terra Nova*, v. 20, p. 289–294.
- Zhao, J.H., Jin, Z.J., Hu, Q.H., Liu, K.Y., and Wang, R.Y., 2019, Geological controls on the accumulation of shale gas: A case study of the early Cambrian shale in the Upper Yangtze area: *Marine and petroleum geology*, v. 107, p. 423–437.
- Zhao, X.M., Zhang, H.F., Zhu, X.K., Tang, S.H., and Yan, B., 2012, Iron isotope evidence for multistage melt–peridotite interactions in the lithospheric mantle of eastern China: *Chem. Geol.*, v. 292–293, p. 127–139.
- Zhou, C.M., Tucker, R., Xiao, S.H., Peng, Z.X., Yuan, X.L., and Chen, Z., 2018, New constraints on the ages of Neoproterozoic glaciations in south China: *Geology*, v. 32, p. 437–440.
- Zhu, X.K., Guo, Y., Williams, R.J.P., O’Nions, R.K., Matthews, A., Belshaw, N.S., Canters, G.W., Waal de, E.C., Weser, U., and Burgess, B.K., 2002, Mass fractionation processes of transition metal isotopes: *Earth Planet. Sci. Lett.*, v. 200, p. 47–62.
- Zhu, Z.Y., Jiang, S.Y., Ciobanu, C.L., Yang, T., Cook, N.J., 2017, Sulfur isotope fractionation in pyrite during laser ablation: Implications for laser ablation multiple collector inductively coupled plasma mass spectrometry mapping: *Chemical Geology*, v. 450, p. 223–234
- Zhu, Z.Y., Cook, N.J., Yang, T., Ciobanu, C.L., Zhao, K.D., and Jiang, S.Y., 2016, Mapping of sulfur isotopes and trace elements in sulfides by LA–(MC)–ICP–MS: Potential Analytical Problems, Improvements and Implications: *Minerals*, v. 110, p. 1–14.
