# Supplementary material
Source: publisher figshare collection journal article supplement (https://gsapubs.figshare.com/articles/dataset/_/20420670)
Supplement: Supplementary file 1 [file 1]

## Sheet: Table S1
Iron isotopes from pyrite in the Nantuo Formation from the ZK01 core section in South China
Number	Sample No.	Depth (m)	δ56Fepy (‰)	2SD
1	ZK01-44	291.9	-0.94	0.08
2	ZK01-57	286.4	-0.21	0.03
3	ZK01-78	283.5	-0.16	0.06
4	ZK01-93	277.2	-0.35	0.04
5	ZK01-107	271.9	0.19	0.04
6	ZK01-111	270.7	-0.6	0.02
7	ZK01-117	265.2	-0.36	0.08
8	ZK01-122	261	0.13	0.07
9	ZK01-125	258.7	0.2	0.01
10	ZK01-138	251	0.54	0.09
11	ZK01-141	248.6	0.51	0.05
12	ZK01-153	239.6	0.59	0.05
13	ZK01-161	234.6	0.91	0.05
14	ZK01-169	228.8	0.33	0.02
15	ZK01-179	220.9	0.96	0.08
16	ZK01-188	214.2	1.1	0.08
17	ZK01-196	208.1	1.01	0.05
18	ZK01-200	204.6	0.88	0.08
19	ZK01-209	198.1	0.88	0.06
20	ZK01-214	194.6	1.12	0.03
21	ZK01-218	191.6	0.61	0.02
22	ZK01-222	188.6	0.65	0.05
23	ZK01-227	184.9	0.84	0.02
24	ZK01-233	180.4	0.79	0.05
25	ZK01-241	174.7	0.78	0.03
26	ZK01-246	170.9	0.4	0.02
27	ZK01-258	162	0.21	0.03
28	ZK01-272	154.6	0.64	0.03
29	ZK01-274	152.5	0.4	0.01
30	ZK01-276	149.9	-0.75	0.18
31	ZK01-281	145	-0.09	0.03
32	ZK01-291	137.6	-0.54	0.01
33	ZK01-296	135.2	0.51	0.04
34	ZK01-300	131.5	0.83	0.02
35	ZK01-307	128.1	0.36	0.01
36	ZK01-320	123	0.99	0.02
37	ZK01-324	120.3	0.88	0.06
38	ZK01-332	114.4	0.2	0.04
39	ZK01-338	109.9	0.01	0.03
40	ZK01-354	98.6	0.49	0.01
41	ZK01-368	88	0.2	0.06
42	ZK01-378	80.6	0.36	0.04
43	ZK01-387	73.8	0.5	0.01
44	ZK01-391	70.7	-0.04	0.03
45	ZK01-396	66.7	0.24	0.08
46	ZK01-400	63.9	0.55	0.08
47	ZK01-401	63.1	0.3	0.02
48	ZK01-403	62.2	0.16	0.01
49	ZK01-407	59	0.41	0.05
50	ZK01-408	58.2	-0.43	0.01
51	ZK01-410	55.9	-0.18	0.01
52	ZK01-414	53.4	-0.03	0.05
53	ZK01-421	47.8	0.1	0.02
54	ZK01-425	44.6	0.06	0.01
55	ZK01-431	42.6	-0.14	0.03
56	ZK01-435	40.4	0.16	0.03
57	ZK01-444	33.5	0.4	0.05
58	ZK01-445	32.7	0.31	0.04
59	ZK01-449	29.2	0.35	0.05
60	ZK01-450	28.4	-0.6	0.02
61	ZK01-454	25.2	0.8	0.09
62	ZK01-460	21.5	0.07	0.02
63	ZK01-468	15.6	-0.17	0.05
64	ZK01-472	12.4	-0.1	0.01
65	ZK01-480	7.4	0.11	0.08
66	ZK01-600	5.8	-0.12	0.05
67	ZK01-602	4.2	-0.46	0.04
68	ZK01-604	2.6	-0.92	0.05

## Sheet: Table S2
Fe-speciation in the Nantuo Formation from the ZK01 core section in South China
Number	Sample No.	Depth (m)	FeT (wt%)	Fecarb (wt%)	Feox	Femag (wt%)	Fepy	FeHR	FeHR/FeT	Fepy/FeHR	FeOX/FeHR
					(wt%)		(wt%)
1	ZK01-44	291.9	1.62	0.45	0.02	0.01	1	1.48	0.91	0.68	0.013
2	ZK01-57	286.4	2.52	0.16	0.01	0.02	2.21	2.39	0.95	0.92	0.004
3	ZK01-78	283.5	2.91	0.3	0.02	0.02	1.98	2.32	0.79	0.85	0.007
4	ZK01-93	277.2	3.39	0.4	0.02	0.02	2.63	3.07	0.91	0.86	0.008
5	ZK01-107	271.9	3.25	0.42	0.02	0.02	2.42	2.88	0.89	0.84	0.007
6	ZK01-111	270.7	1.92	0.46	0.02	0.02	0.76	1.26	0.66	0.6	0.017
7	ZK01-117	265.2	5.12	0.56	0.02	0.01	3.97	4.57	0.89	0.87	0.004
8	ZK01-122	261	1.62	0.51	0.02	0.02	0.45	0.99	0.61	0.45	0.022
9	ZK01-125	258.7	1.58	0.67	0.03	0.01	0.31	1.03	0.65	0.31	0.03
10	ZK01-138	251	2.52	1.4	0.05	0.13	0.03	1.61	0.64	0.02	0.03
11	ZK01-141	248.6	2.96	1.78	0.05	0.15	0.02	2	0.68	0.01	0.025
12	ZK01-153	239.6	2.16	1.13	0.04	0.09	0.02	1.28	0.59	0.01	0.028
13	ZK01-161	234.6	2.87	1.79	0.06	0.12	0.06	2.04	0.71	0.03	0.03
14	ZK01-169	228.8	2.13	0.37	0.02	0.01	1.01	1.42	0.67	0.71	0.016
15	ZK01-181	219.3	2.82	1.7	0.05	0.13	0.02	1.89	0.67	0.01	0.024
16	ZK01-188	214.2	2.9	1.51	0.07	0.15	0.02	1.75	0.6	0.01	0.039
17	ZK01-200	204.6	3.81	1.12	0.07	0.24	0.05	1.48	0.39	0.03	0.049
18	ZK01-209	198.1	3.14	0.99	0.06	0.19	0.01	1.25	0.4	0.01	0.045
19	ZK01-218	191.6	3.08	1.69	0.06	0.17	0.02	1.94	0.63	0.01	0.03
20	ZK01-222	188.6	3.08	1.88	0.06	0.16	0.05	2.15	0.7	0.02	0.027
21	ZK01-233	180.4	3.15	0.66	0.06	0.2	0.02	0.95	0.3	0.02	0.067
22	ZK01-246	170.9	2.54	0.58	0.06	0.13	0.05	0.82	0.32	0.06	0.071
23	ZK01-250	167.7	3.11	0.59	0.06	0.19	0.04	0.88	0.28	0.05	0.065
24	ZK01-255	163	3.2	0.59	0.06	0.18	0.02	0.85	0.27	0.03	0.066
25	ZK01-258	162	3.27	0.5	0.05	0.21	0.03	0.79	0.24	0.04	0.064
26	ZK01-264	157.4	3.24	0.53	0.06	0.2	0.02	0.82	0.25	0.03	0.073
27	ZK01-272	154.6	3.1	0.51	0.06	0.19	0.03	0.79	0.25	0.04	0.082
28	ZK01-279	146.9	3.26	0.53	0.06	0.2	0.02	0.81	0.25	0.02	0.078
29	ZK01-285	141.1	3.46	0.22	0.04	0.13	0.02	0.41	0.12	0.06	0.088
30	ZK01-293	136.5	3.12	0.47	0.05	0.18	0.01	0.72	0.23	0.02	0.075
31	ZK01-296	135.2	3.01	0.43	0.06	0.19	0.04	0.71	0.24	0.05	0.082
32	ZK01-298	132.5	3.83	0.47	0.07	0.25	0.31	1.1	0.29	0.28	0.065
33	ZK01-300	131.5	3.11	0.46	0.07	0.21	0.04	0.78	0.25	0.05	0.085
34	ZK01-314	125.2	3.89	0.29	0.05	0.18	0.01	0.53	0.14	0.03	0.085
35	ZK01-320	123	2.02	0.25	0.03	0.08	0	0.36	0.18	0.01	0.072
36	ZK01-332	114.4	2.94	0.41	0.04	0.12	0.08	0.64	0.22	0.12	0.06
37	ZK01-338	109.9	3.39	0.52	0.06	0.15	0.12	0.85	0.25	0.14	0.065
38	ZK01-343	106.1	3.61	0.37	0.05	0.17	0.15	0.74	0.21	0.2	0.07
39	ZK01-354	98.6	3.75	0.4	0.05	0.19	0.13	0.77	0.21	0.17	0.068
40	ZK01-361	90	3.89	0.42	0.06	0.21	0.15	0.83	0.21	0.18	0.069
41	ZK01-368	88	3.57	0.4	0.05	0.15	0.16	0.76	0.21	0.21	0.06
42	ZK01-373	84.4	3.56	0.38	0.06	0.21	0.15	0.79	0.22	0.18	0.079
43	ZK01-378	80.6	3.59	0.3	0.05	0.18	0.19	0.72	0.2	0.26	0.068
44	ZK01-383	76.9	3.59	0.36	0.05	0.17	0.09	0.67	0.19	0.14	0.077
45	ZK01-387	73.8	3.86	0.42	0.04	0.16	0.14	0.76	0.2	0.18	0.056
46	ZK01-391	70.7	3.48	0.36	0.04	0.14	0.13	0.67	0.19	0.19	0.061
47	ZK01-396	66.7	3.57	0.32	0.04	0.14	0.15	0.65	0.18	0.23	0.055
48	ZK01-401	63.1	3.38	0.34	0.05	0.17	0.2	0.75	0.22	0.26	0.063
49	ZK01-403	62.2	3.63	0.32	0.04	0.15	0.19	0.7	0.19	0.27	0.059
50	ZK01-407	59	3.67	0.29	0.03	0.15	0.22	0.7	0.19	0.32	0.047
51	ZK01-414	53.4	3.46	0.58	0.05	0.21	0.15	0.99	0.29	0.15	0.054
52	ZK01-421	47.8	3.16	0.19	0.03	0.11	0.09	0.42	0.13	0.22	0.073
53	ZK01-425	44.6	4.28	0.33	0.04	0.22	0.01	0.61	0.14	0.02	0.065
54	ZK01-431	42.6	2.93	0.25	0.04	0.15	0.06	0.5	0.17	0.12	0.075
55	ZK01-440	37.4	3.03	0.28	0.04	0.17	0.14	0.63	0.21	0.22	0.069
56	ZK01-444	33.5	2.96	0.25	0.03	0.08	0.37	0.73	0.25	0.51	0.042
57	ZK01-449	29.2	5.35	0.58	0.07	0.31	0.07	1.03	0.19	0.07	0.065
58	ZK01-454	25.2	2.75	0.22	0.03	0.13	0.06	0.45	0.16	0.14	0.073
59	ZK01-460	21.5	3.18	0.24	0.04	0.13	0.03	0.44	0.14	0.08	0.081
60	ZK01-464	18.5	3.95	0.24	0.04	0.17	0.17	0.62	0.16	0.28	0.072
61	ZK01-466	16.9	4.06	0.25	0.04	0.18	0.1	0.57	0.14	0.17	0.077
62	ZK01-468	15.6	3.59	0.22	0.04	0.16	0.04	0.47	0.13	0.08	0.091
63	ZK01-469	14.5	3.63	0.24	0.05	0.15	0.11	0.55	0.15	0.19	0.089
64	ZK01-472	12.4	3.41	0.19	0.04	0.15	0.11	0.48	0.14	0.22	0.081
65	ZK01-480	7.4	3.86	0.23	0.05	0.17	0.1	0.55	0.14	0.18	0.089
66	ZK01-600	5.8	3.08	0.26	0.04	0.13	0.03	0.46	0.15	0.06	0.085
67	ZK01-605	1.8	3.15	0.2	0.02	0.11	0.02	0.36	0.11	0.07	0.064

## Sheet: Table S3
Sulfur isotopes from pyrite in the Nantuo Formation from the ZK01 core section in South China
Number	Sample No.	Depth (m)	δ34Spy (‰)	2SE	δ34Spy（average）
1	ZK01-41	292.5	30	0.33	26.1
			20.5	0.25
			29.2	0.52
			24.7	0.21
2	ZK01-44	291.9	34.8	0.07	33.4
			32.8	0.56
			32.6	0.48
3	ZK01-49	290.7	17.8	0.09	17.7
			17.2	0.16
			18	0.25
4	ZK01-57	286.4	16.1	0.11	15.6
			16.5	0.21
			15.5	0.24
			14.3	0.12
5	ZK01-65	285.1	17.8	0.45	23.1
			20.2	0.55
			31.2	0.68
6	ZK01-78	283.5	17.7	0.2	17.8
			17.6	0.17
			16	0.13
			20	0.12
7	ZK01-93	277.2	15.2	0.16	15
			14.9	0.07
8	ZK01-107	271.9	16.1	0.07	14.4
			12.9	0.15
			13.5	0.09
			15	0.07
9	ZK01-111	270.7	16.8	0.3	16.3
			15.7	0.22
10	ZK01-117	265.2	8	0.22	11.6
			15	0.09
			11.8	0.09
11	ZK01-122	261	19.1	0.36	17.7
			16.8	0.13
			17.4	0.14
12	ZK01-125	258.7	12.3	0.1	12.2
			12	0.1
13	ZK01-132	254.8	12.1	0.09	11.6
			10.5	0.12
			12.1	0.13
14	ZK01-135	253	10.7	0.15	10.9
			11.2	0.17
15	ZK01-138	251	12.7	0.06	12.9
			13	0.06
			13.1	0.07
16	ZK01-141	248.6	14.6	0.09	12.8
			11.6	0.21
			12.3	0.43
17	ZK01-153	239.6	13	0.09	12.1
			11	0.39
			12.4	0.11
18	ZK01-161	234.6	8.8	0.3	8.8
19	ZK01-169	228.8	10.4	0.1	7.4
			6.8	0.23
			5	0.28
20	ZK01-172	226.5	10.5	0.11	11.4
			11.7	0.11
			11.9	0.07
21	ZK01-175	224.3	12.8	0.12	10.8
			8.8	0.2
22	ZK01-196	208.1	13.9	0.13	11.8
			9.7	0.22
			11.7	0.19
23	ZK01-200	204.6	13.8	0.19	10.7
			7.6	0.11
24	ZK01-209	198.1	12.8	0.78	8.4
			4.1	0.99
25	ZK01-214	194.6	16.1	0.34	16.1
26	ZK01-218	191.6	13.2	0.13	12
			10.8	0.2
27	ZK01-258	162	11.7	0.09	11.8
			12	0.13
28	ZK01-263	158.3	11	0.45	11.1
			11.3	0.57
29	ZK01-272	154.6	18.1	0.34	17.5
			20.2	0.23
			14.2	0.32
30	ZK01-281	145	16.2	0.54	16.5
			16.8	0.45
31	ZK01-300	131.5	20.2	0.09	20.5
			20.8	0.17
32	ZK01-320	123	30.7	0.07	27.4
			23.8	0.15
			27.7	0.11
33	ZK01-324	120.3	16.1	0.13	14.8
			13.4	0.17
34	ZK01-343	106.1	27.1	0.09	27.1
35	ZK01-354	98.6	22.9	0.18	31.3
			40.3	0.27
			30.2	0.09
36	ZK01-368	88	21.7	0.9	27.3
			30.8	0.08
			29.3	0.22
37	ZK01-373	84.4	36.6	0.27	28
			19.5	0.29
38	ZK01-378	80.6	9.3	0.34	17.3
			25.3	0.27
39	ZK01-383	76.9	21.7	0.67	21.8
			21.9	0.54
40	ZK01-387	73.8	34.3	0.29	34.1
			33.8	0.12
41	ZK01-395	67.6	28.2	0.15	30.6
			33	0.3
42	ZK01-400	63.9	38	0.53	30.1
			22.3	0.24
43	ZK01-408	58.2	33.8	0.52	31.8
			30.7	0.29
			30.9	0.3
44	ZK01-426	46	27.1	1.1	23.9
			24.3	0.13
			20.4	0.22
45	ZK01-431	42.6	15.8	0.16	18.9
			20.6	0.14
			20.4	0.16
46	ZK01-436	39.2	22.8	0.38	22.3
			19.2	0.48
			24.9	0.08
47	ZK01-460	21.5	9.2	0.23	5.3
			4.7	0.33
			2	0.12
48	ZK01-472	12.4	10.5	0.08	9.8
			9.1	0.12
49	ZK01-480	7.4	25.2	0.27	21.3
			27.7	0.33
			11.1	0.45
50	ZK01-604	2.6	22.1	0.08	25.1

## Sheet: Table S4
Total carbon content (TOC) in the Nantuo Formation from the ZK01 core section in South China
Number	Sample No.	Depth (m)	TOC (%)
1	ZK01-41	292.5	0.041
2	ZK01-49	290.7	0.035
3	ZK01-78	283.5	0.028
4	ZK01-93	277.2	0.046
5	ZK01-117	265.2	0.022
6	ZK01-125	258.7	0.038
7	ZK01-141	248.6	0.028
8	ZK01-153	239.6	0.03
9	ZK01-169	228.8	0.047
10	ZK01-175	224.3	0.027
11	ZK01-188	214.2	0.027
12	ZK01-200	204.6	0.03
13	ZK01-218	191.6	0.03
14	ZK01-233	180.4	0.056
15	ZK01-258	162	0.02
16	ZK01-272	154.6	0.023
17	ZK01-281	145	0.025
18	ZK01-320	123	0.031
19	ZK01-324	120.3	0.03
20	ZK01-343	106.1	0.061
21	ZK01-354	98.6	0.073
22	ZK01-368	88	0.079
23	ZK01-378	80.6	0.078
24	ZK01-395	67.6	0.092
25	ZK01-408	58.2	0.085
26	ZK01-426	46	0.069
27	ZK01-436	39.2	0.062
28	ZK01-460	21.5	0.067
29	ZK01-475	10.5	0.043
30	ZK01-600	5.8	0.093
31	ZK01-604	2.6	0.067

## Sheet: G50147
Shen, W., et al., 2022, Secular variation in seawater redox state during the Marinoan Snowball Earth event and implications for eukaryotic evolution: Geology, v. 50, https://doi.org/10.1130/G50147.1
